# Supplementary material for: Evaluation of emergency care education and triage implementation: an observational study at a hospital in rural Liberia
Source: PubMed Central journal article supplement — BMJ Open. 2023 May 18;13(5):e067343. doi: 10.1136/bmjopen-2022-067343 (PMC10201217; doi:10.1136/bmjopen-2022-067343), 2023-05-18
Supplement: bmjopen-2022-067343.draft_revisions.pdf [file bmjopen-2022-067343.draft_revisions.pdf]

# BMJ Open

BMJ Open is committed to open peer review. As part of this commitment we make the peer review history of every article we publish publicly available.

When an article is published we post the peer reviewers' comments and the authors' responses online. We also post the versions of the paper that were used during peer review. These are the versions that the peer review comments apply to.

The versions of the paper that follow are the versions that were submitted during the peer review process. They are not the versions of record or the final published versions. They should not be cited or distributed as the published version of this manuscript.

BMJ Open is an open access journal and the full, final, typeset and author-corrected version of record of the manuscript is available on our site with no access controls, subscription charges or pay-per-view fees (<http://bmjopen.bmj.com>).

If you have any questions on BMJ Open's open peer review process please email [info.bmjopen@bmj.com](mailto:info.bmjopen@bmj.com)

# BMJ Open

## Emergency Care Education and Triage Implementation improves care outcomes in Rural Liberia

|                               |                                                                                                                                                                                                                                                                                                                                                                                                                                                                                                                                                                                                                                                                                                                                                                                                                                                                                                                                                                                           |
|-------------------------------|-------------------------------------------------------------------------------------------------------------------------------------------------------------------------------------------------------------------------------------------------------------------------------------------------------------------------------------------------------------------------------------------------------------------------------------------------------------------------------------------------------------------------------------------------------------------------------------------------------------------------------------------------------------------------------------------------------------------------------------------------------------------------------------------------------------------------------------------------------------------------------------------------------------------------------------------------------------------------------------------|
| Journal:                      | <i>BMJ Open</i>                                                                                                                                                                                                                                                                                                                                                                                                                                                                                                                                                                                                                                                                                                                                                                                                                                                                                                                                                                           |
| Manuscript ID                 | bmjopen-2022-067343                                                                                                                                                                                                                                                                                                                                                                                                                                                                                                                                                                                                                                                                                                                                                                                                                                                                                                                                                                       |
| Article Type:                 | Original research                                                                                                                                                                                                                                                                                                                                                                                                                                                                                                                                                                                                                                                                                                                                                                                                                                                                                                                                                                         |
| Date Submitted by the Author: | 16-Aug-2022                                                                                                                                                                                                                                                                                                                                                                                                                                                                                                                                                                                                                                                                                                                                                                                                                                                                                                                                                                               |
| Complete List of Authors:     | Towns, Kathleen; University of Michigan Michigan Medicine, Internal Medicine; Partners In Health<br>Dolo, Isaac; Partners In Health Liberia<br>Pickering, Ashley; University of Colorado - Anschutz Medical Campus, CO, USA<br>Ludmer, Nicholas; University of Illinois Chicago Department of Emergency Medicine; Partners In Health<br>Karanja, Viola; Partners In Health Liberia<br>Marsh, Regan H ; Harvard Medical School; Partners In Health<br>Horace, Minnie; McGill University<br>Dweh, Denny; Partners In Health Liberia<br>Dalieh, Tresa; Partners In Health Liberia<br>Myers, Sharon; Partners In Health Liberia<br>Bukhman, Alice; Harvard Medical School; Partners In Health<br>Gashi, Jason; Boston University<br>Sonenthal, Paul; Harvard Medical School; Partners In Health<br>Ulysse, Patrick; Partners In Health; Partners In Health Liberia<br>Cook, Rebecca; Harvard Medical School; Partners In Health<br>Rouhani, Shada; Harvard Medical School; Partners In Health |
| Keywords:                     | ACCIDENT & EMERGENCY MEDICINE, EDUCATION & TRAINING (see Medical Education & Training), MEDICAL EDUCATION & TRAINING                                                                                                                                                                                                                                                                                                                                                                                                                                                                                                                                                                                                                                                                                                                                                                                                                                                                      |
|                               |                                                                                                                                                                                                                                                                                                                                                                                                                                                                                                                                                                                                                                                                                                                                                                                                                                                                                                                                                                                           |

SCHOLARONE™  
Manuscripts

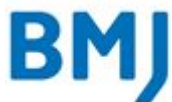

I, the Submitting Author has the right to grant and does grant on behalf of all authors of the Work (as defined in the below author licence), an exclusive licence and/or a non-exclusive licence for contributions from authors who are: i) UK Crown employees; ii) where BMJ has agreed a CC-BY licence shall apply, and/or iii) in accordance with the terms applicable for US Federal Government officers or employees acting as part of their official duties; on a worldwide, perpetual, irrevocable, royalty-free basis to BMJ Publishing Group Ltd ("BMJ") its licensees and where the relevant Journal is co-owned by BMJ to the co-owners of the Journal, to publish the Work in this journal and any other BMJ products and to exploit all rights, as set out in our [licence](#).

The Submitting Author accepts and understands that any supply made under these terms is made by BMJ to the Submitting Author unless you are acting as an employee on behalf of your employer or a postgraduate student of an affiliated institution which is paying any applicable article publishing charge ("APC") for Open Access articles. Where the Submitting Author wishes to make the Work available on an Open Access basis (and intends to pay the relevant APC), the terms of reuse of such Open Access shall be governed by a Creative Commons licence – details of these licences and which [Creative Commons](#) licence will apply to this Work are set out in our licence referred to above.

Other than as permitted in any relevant BMJ Author's Self Archiving Policies, I confirm this Work has not been accepted for publication elsewhere, is not being considered for publication elsewhere and does not duplicate material already published. I confirm all authors consent to publication of this Work and authorise the granting of this licence.

1  
2  
3  
4  
5  
6  
7  
8  
9  
10  
11  
12  
13  
14  
15  
16 Emergency Care Education and Triage Implementation improves care outcomes in Rural Liberia  
17

18 Towns, Kathleen (0000-0003-2017-0229)\*<sup>1,2</sup>, Dolo, Isaac\*<sup>3</sup>, Pickering, Ashley<sup>4</sup>, Ludmer,  
19 Nicholas<sup>2,5</sup>, Karanja, Viola<sup>3</sup>, Marsh, Regan H.<sup>2,6</sup>, Horace, Minnie<sup>7</sup>, Dweh, Denny<sup>3</sup>, Dalieh,  
20 Tresa<sup>3</sup>, Myers, Sharon<sup>3</sup>, Bukhman, Alice<sup>2,6</sup>, Gashi, Jason<sup>8</sup>, Sonenthal, Paul<sup>2,6</sup>, Ulysse, Patrick<sup>2,3</sup>,  
21 Cook, Rebecca<sup>2,6</sup>, Rouhani, Shada A.<sup>2,6</sup>  
22  
23

24 \*Co-first authors  
25

26 <sup>1</sup>University of Michigan, Ann Arbor, MI, USA

27 <sup>2</sup>Partners In Health, Boston, MA, USA

28 <sup>3</sup>Partners In Health, Liberia

29 <sup>4</sup>University of Maryland, College Park, MD, USA

30 <sup>5</sup>University of Chicago, Chicago, IL, USA

31 <sup>6</sup>Harvard Medical School, Boston, MA, USA

32 <sup>7</sup>McGill University, Montreal, Canada

33 <sup>8</sup>Boston University, Boston, MA, USA  
34  
35

36  
37 Correspondence to: Kathleen Towns; [katrobin@med.umich.edu](mailto:katrobin@med.umich.edu)  
38

39 Word Count: 3,294  
40  
41  
42  
43  
44  
45  
46  
47  
48  
49  
50  
51  
52  
53  
54  
55  
56  
57  
58  
59  
60

## ABSTRACT

**Objective** To evaluate key process outcomes before and after two scheduled emergency care and triage trainings.

**Design** An observational, retrospective cross-sectional review of emergency department handwritten records.

**Setting** A regional hospital emergency department in Southeastern Liberia from February 1, 2019 to December 31, 2019.

**Participants** There were 8,222 patient visits recorded that were included in our analysis.

**Main outcome measures** Primary outcome was a complete set of recorded vital signs at any time during the patient's ED visit. Secondary outcomes examined included documentation of 6 defined process outcomes.

**Results** Patients in the post-training 1 group had higher odds of having a documented full set of vital signs compared to the baseline group (16% v 3.5%, OR 5.4 (95% CI 4.3 to 6.7)). After triage implementation, patients who were triaged were 16 times more likely to have a full set of vitals compared to those who were not triaged. Similarly, compared to the baseline group, patients in the post-training 1 group had higher odds of having a glucose documented if they presented with altered mental status or a neurologic complaint (37% v 30%, OR 1.7 (CI 1.3 to 2.2)), documented antibiotic administration if they had a presumed bacterial infection (87% v 35%, OR 12.8 (CI 8.8 to 17.1)), documented malaria test if presenting with fever (76% v 61%, OR 2.05 (CI 1.37 to 3.08)) or documented repeat set of vitals if presenting with shock (25% v 6.6%, OR 8.85 (CI 1.67 to 14.06)). There was no significant difference in the above process outcomes between the trainings.

**Conclusion** This study showed improvement in most process measures between the baseline and post-training 1 groups, benefits that persisted post-training 2, thus supporting the importance of short-course training interventions to durably improve facility-based care.

### **Strengths and limitations of this study**

- Significant improvements in quality metrics were demonstrated after triage implementation and basic emergency care trainings in a rural hospital where previous emergency care training was limited, supporting the ability of short-course interventions to improve facility-based care.
- This study was conducted at a single site in rural Liberia that had not received any prior emergency care training and the generalizability of our findings is unknown.
- Given retrospective data collection of process metrics from handwritten charts instead of direct observation of tasks there may be missing data from under-reporting or non-recording of tasks.

### **INTRODUCTION**

Emergency care has been increasingly recognized as a fundamental component to strengthening health systems<sup>1,3-6</sup> and an effective means to address multiple Sustainable Development Goals and reduce the overall burden of disease.<sup>1,7</sup> An estimated 54% of annual deaths in low and middle-income countries (LMICs) could be addressed by pre-hospital and hospital-based emergency care.<sup>8</sup> Specifically, injury related mortality disproportionately affects LMICs, and accounts for more than 90% of the total global mortality related to injury.<sup>10</sup> Emergency care

1  
2  
3 saves lives across the spectrum of illness, from injuries to acute presentations of chronic disease,  
4  
5 and is the first contact with the health system for many.<sup>1-3,9</sup>  
6  
7  
8  
9

10 Emergency care in Liberia, like many LMICs, is still in its early development. In 2007,  
11  
12 emergency care was first included in Liberia's national health plan and basic package of health  
13  
14 services.<sup>11,12</sup> There has been some development of emergency education at the national referral  
15  
16 hospital in the capital of Monrovia; however, no other consistent or standardized emergency  
17  
18 medicine curriculum has been established.<sup>13</sup> The basic package of health services outlines the  
19  
20 essentials of emergency care for each service level.<sup>11</sup> Currently, there are no formal indicators  
21  
22 measuring care or process outcomes for emergency care nationally.  
23  
24  
25  
26  
27

28  
29 In 2014, the Ebola outbreak led to the near-collapse of the country's already weakened health  
30  
31 system, which was recovering from recent civil war (1989-1996 and 1999-2003).<sup>13-15</sup> In 2015,  
32  
33 responding to the Ebola epidemic, the global non-profit organization Partners In Health (PIH), at  
34  
35 the invitation of and in partnership with the Liberian government, came to Liberia to support the  
36  
37 emergency response and long-term strengthening of the health system. Given clear emergency  
38  
39 care needs in Maryland County, a key goal of PIH's became to expand and strengthen  
40  
41 emergency services, which included developing the health workforce capacity to provide high-  
42  
43 quality emergency care with the support of emergency care trainings and triage implementation.  
44  
45  
46 The objective of this observational study was to evaluate key process outcomes before and after  
47  
48 triage implementation and emergency care trainings to assess its impact on quality of care and  
49  
50 identify areas for future improvement.  
51  
52  
53  
54  
55  
56  
57  
58  
59  
60

## METHODS

### Study Design

An observational, retrospective cross-sectional study of patients presenting to a regional hospital ED in Southeastern Liberia.

### Study Setting

The observational study was carried out at JJD, the only county referral hospital in rural, Southeastern Liberia. It is a government-run hospital supported by PIH and provides services free of charge. JJD serves a primary catchment area of 187,000 people in Maryland county and receives additional referrals from neighboring counties. At the time of the training, JJD's 8-bed ED was primarily staffed by nurses and physician assistants (PAs). At the time of the trainings there was no trained emergency medicine physician at the hospital. Specialists in the four core clinical departments of pediatrics, internal medicine, surgery and obstetrics and gynecology provide clinical support to the ED in their respective clinical areas as needed. Prior to 2019, no ED staff had specific emergency care course training. In addition to nurses and PAs, nursing students and aides worked within the ED; after triage was implemented in May 2019, nursing aides primarily staffed ED triage.

### Emergency Care Trainings

In late April and early May 2019, a series of pre-scheduled trainings were conducted to improve emergency care at JJD. First, staff were trained on the WHO-ICRC-MSF integrated interagency triage tool (IIATT) through didactics followed by real-time supervision and mentorship on the implementation of triage.<sup>16</sup> Triage is an essential component of emergency care; it evaluates a



1  
2  
3 patient's acuity and prioritizes evaluation and treatment based on the severity of the patient's  
4  
5 condition.<sup>6</sup> The IIATT assigns patients to a 3-tier acuity system, based on specified symptoms,  
6  
7 physical signs, and high risk vital signs.<sup>16</sup>  
8  
9

10  
11  
12 Following the IIATT training, 12 staff received 2 weeks of training on the WHO Basic  
13  
14 Emergency Care (BEC) course, followed by the complementary PIH Fundamentals of  
15  
16 Emergency Care training. The WHO BEC course was composed of didactic, small group  
17  
18 sessions and skills session, designed to train staff to identify and manage acute illnesses and  
19  
20 injuries with limited resources.<sup>17,18</sup> The supplemental PIH course included additional topics (eg.  
21  
22 approach to abdominal pain and fever), and skills such as basic EKG and ultrasound. The  
23  
24 didactic courses were followed by two weeks of clinical mentorship by a visiting faculty  
25  
26 emergency physician. Afterwards, ongoing occasional clinical mentorship was supported by non-  
27  
28 EM faculty who worked at JJD.  
29  
30  
31

32  
33  
34  
35 In mid-October 2019, 16 JJD staff participated in a three-day refresher training. Five participants  
36  
37 had not completed the initial training, so received a pre-course one-day intensive training on key  
38  
39 concepts covered previously. An emergency PA provided ongoing clinical mentorship 4 days a  
40  
41 week for the subsequent 3 months.  
42  
43  
44

### 45 46 47 **Study Population**

48  
49 The study was conducted from February 1, 2019 to December 31, 2019. During this period, all  
50  
51 patients presenting to the JJD ED for whom a visit was either documented in the ED ledger or a  
52  
53 handwritten chart were included in the study.  
54  
55  
56  
57  
58  
59  
60

## Data Collection

Trained data collectors extracted information from handwritten ED records into a pre-developed data extraction tool. Prior to May 2019, all initial visit documentation occurred exclusively in the ED ledger, including demographics, reason for the visit, vital signs, lab testing, key results, diagnosis, and disposition. After May 2019, documentation included three sources: the ED ledger, an ED triage form, and a ED provider documentation form adapted from the WHO Emergency Unit forms.<sup>19</sup> These forms were introduced in May 2019 and used by staff performing the initial evaluation and resuscitation. The ED ledger was a bound book with handwritten content, described above. The ED triage form documented triage acuity based on presenting symptoms and vital signs based on the interagency integrated triage tool. The ED provider documentation form included sections for vital signs, chief complaint, primary survey, history of presenting illness, review of systems, past medical history, assessment, and plan. Data collectors reviewed all these source and recorded demographics, initial vital signs, select clinical process measures and outcome variables, and final patient disposition.

## Variables and Outcomes

We classified visits from February 1, 2019 to April 30, 2019 as “pre-training”, visits from May 29, 2019 to October 13, 2019 as “post-training 1”, and October 21, 2019 to December 31, 2019 as “post-training 2.” Visits from May 1, 2019 to May 28, 2019 and October 14, 2019 to October 20, 2019 were considered to be in “intermediate” time periods (e.g., time periods during the trainings themselves) and excluded from comparative analyses (as seen in figure 1). Data with missing date and age variables were also excluded from the analysis.

1  
2  
3  
4  
5 Due to differences in documentation standards prior to the ED trainings, we focused our analyses  
6 on variables and process metrics that were reliably and routinely captured in the JJD ED register.  
7  
8 The study team reviewed process metrics recommended by the African Federation of Emergency  
9  
10 Medicine, as well as a review of quality metrics used in LMIC EDs.<sup>20,21</sup> From these lists, study  
11  
12 outcomes were chosen based on local context, hospital and government priorities, and pre-  
13  
14 existing documentation patterns that determined what baseline data was available. The primary  
15  
16 study outcome was a complete set of recorded vital signs at any time during the patient's ED  
17  
18 visit and was chosen given the importance of vital signs to triage and emergency care.<sup>22,23</sup>  
19  
20  
21  
22  
23  
24  
25

26 Secondary outcomes examined included documentation of: blood glucose for patients presenting  
27  
28 with altered mental status or a neurologic complaint; antibiotic administration or prescription in  
29  
30 patients with a presumed bacterial infection; malaria diagnostic testing in patients with  
31  
32 temperature  $\geq 38^{\circ}\text{C}$ ; oxygen administration for hypoxia; repeat vital signs for shock; and  
33  
34 intravenous fluids for shock (hypoxia and shock were defined by age, Table 1). A PA interpreted  
35  
36 the final diagnoses to determine if the visit was due to a presumed bacterial infection. In the  
37  
38 absence of microbiology capability to perform cultures and accounting for local context and  
39  
40 practice patterns, all diagnoses of pneumonia, urinary tract infections, meningitis, cellulitis, and  
41  
42 sepsis were presumed to have been bacterial. Tuberculosis (TB) was excluded from the list of  
43  
44 bacterial infections, as TB patients are referred to TB clinic to initiate treatment and therefore not  
45  
46 reliably documented as part of ED care. A patient was coded as a neurologic complaint if the  
47  
48 clinical documentation included altered mental status, weakness, dizziness, or seizures.  
49  
50  
51  
52  
53  
54  
55  
56  
57  
58  
59  
60

Table 1. Variable Definitions

|              |                            |                                                           |
|--------------|----------------------------|-----------------------------------------------------------|
| Hypoxia      |                            |                                                           |
|              | Age $\leq$ 5 years         | SpO <sub>2</sub> $\leq$ 94%                               |
|              | Age > 5 years              | SpO <sub>2</sub> $\leq$ 92%                               |
| Fever        |                            |                                                           |
|              |                            | temperature $\geq$ 38°C                                   |
| Shock Vitals |                            |                                                           |
|              | Age 0 to < 1 years*        | HR > 160bpm                                               |
|              | Age $\geq$ 1 to < 3 years* | HR > 160bpm                                               |
|              | Age $\geq$ 3 to < 5 years* | HR > 140bpm                                               |
|              | Age $\geq$ 5 to < 13 years | HR of $\geq$ 130bpm or a systolic blood pressure < 70mmHg |
|              | Age $\geq$ 13 years        | HR of $\geq$ 130bpm or a systolic blood pressure < 80mmHg |

\*Note: Blood pressure was not included as a criterion in the younger age groups as it is not reliably recorded.

## Data Analysis

Data was transcribed into Excel, then imported into and analyzed with Stata (Version 15).<sup>24</sup>

Simple descriptive statistics were used to describe the patient demographics and Chi-Square analyses were used to test for significance using a nominal threshold of 0.05. Odds ratios and 95% confidence intervals were calculated for pre-determined process measurements as described above.

## Ethical Approval

The study was approved by the Partners Healthcare IRB 2019P001944 as well as the University of Liberia-Pacific Institute for Research and Evaluation IRB 17-06-048 as part of the clinical and training protocol that Partners In Health Liberia submits annually for review.

## Funding

This work was funded by the Ansara Family Foundation; funders did not have any role in study design or the analysis or publication of results. There is not an award or grant number available.

## Patient and Public Involvement

Patients and/or the public were not involved in the design, conduct, reporting or dissemination plans of this research.

## RESULTS

There were 8,774 patient visits recorded in the JJD ED from February 1, 2019 to December 31, 2019 and included in our analysis: 2,732 in the pre-training time period, 3,194 in the ‘post-training 1’ time period, 2,296 in the ‘post-training 2’ time period, and 552 in the ‘indeterminate’ time periods, which were excluded from the analysis (Table 2).

Table 2. Demographic description of gender and age at J.J. Dossen Hospital<sup>^</sup>

| Age [Years] | Male<br>n (%) | Female<br>n (%) | Gender Missing<br>n (%) | Total<br>n (%) |
|-------------|---------------|-----------------|-------------------------|----------------|
| 0 - <5      | 1,102 (52.9)  | 954 (45.8)      | 29 (1.4)                | 2,085 (25.4)   |
| 5 - <18     | 858 (47.6)    | 917 (50.9)      | 26 (1.4)                | 1,801 (21.9)   |
| 18+         | 2,015 (47.6)  | 2,183 (51.6)    | 36 (0.9)                | 4,234 (51.5)   |
| Age Missing | 40 (39.2)     | 56 (54.9)       | 6 (5.9)                 | 102 (1.2)      |
| Total       | 4,015 (48.6)  | 4,110 (54.9)    | 97 (1.2)                | 8,222          |

<sup>^</sup>Includes all patients from pre-training, post-training 1, and post-training 2 time periods.

In the baseline time period, only 3.5% of patients had a complete set of vital signs documented (Table 3). In both post-training 1 and post-training 2 time periods, patients had higher odds of having a documented full set of vital signs (16% OR 5.4 (95% CI 4.3-6.7)). Adults were statistically more likely than children to have a documented full set of vitals (OR 1.43 (95% CI 1.26-1.62), and were also more likely to have heart rate, oxygen saturation, respiratory rate and

1  
2  
3 blood pressure documented (Table 4). Triage, implemented as part of Training 1, significantly  
4 influenced the likelihood of having a full set of vital signs recorded: patients who were triaged  
5 were 16 times more likely to have a full set of vitals compared to those in the same time periods  
6 who were not triaged (60% v 8.6%, OR 15.9 (95% CI 13.37-18.91)). There was no difference in  
7 vital signs obtained by gender.  
8  
9  
10  
11  
12  
13

14  
15  
16  
17 All process outcomes measured showed significant quality improvements in the post-training  
18 groups compared to the baseline group, except the percent of patients with shock documented to  
19 receive IV fluids (Table 5). After the initial training, patients had higher odds of having a glucose  
20 documented for altered mental status or neurologic complaints (37% v 30%, OR 1.7 (95% CI  
21 1.3-2.2)). Patients also had higher odds of having antibiotics documented for presumed bacterial  
22 infections (87% v 35%, OR 12.8 (95% CI 8.8-17.1)) and documented malaria diagnostic testing  
23 for fever (76% v 61%, OR 2.05 (1.37-3.08)) in the post-training 1 time periods. Additionally,  
24 patients presenting with shock were more likely to have a repeat set of vital signs documented  
25 (25% v 6.6%, OR 8.85 (1.67-14.06)). Although there was no statistically significant difference  
26 between pre-training and post-training 1 in patients presenting with hypoxia documented to  
27 receive oxygen, there was a statistical difference between post-training 2 and pre-training time  
28 periods (35.7% v 11.1%, OR 4.44 (1.15 to 17.25)). There were no significant differences  
29 between the post-training 1 and post-training 2 groups on any metrics. Metrics did not vary  
30 significantly by age group.  
31  
32  
33  
34  
35  
36  
37  
38  
39  
40  
41  
42  
43  
44  
45  
46  
47  
48  
49  
50  
51  
52  
53  
54  
55  
56  
57  
58  
59  
60

Table 3. Documented vital signs measurement by training group

|                       | Pre-training<br>(n=2,732) | Post-training 1<br>(n=3,194) | Post-training 2<br>(n=2,296)                         |              | Odds ratio <sup>^</sup><br>(95%CI)<br>compared to post-<br>training 1 |                     |
|-----------------------|---------------------------|------------------------------|------------------------------------------------------|--------------|-----------------------------------------------------------------------|---------------------|
|                       | n (%)                     | n (%)                        | Odds ratio* (95% CI)<br>compared to pre-<br>training | n (%)        | Odds ratio* (95% CI)<br>compared to pre-<br>training                  |                     |
| Heart rate            | 925 (33.9)                | 1,763 (55.2)                 | 2.41 (2.17 to 2.67)                                  | 1,183 (51.5) | 2.08 (1.85 to 2.33)                                                   | 0.86 (0.77 to 0.96) |
| Respiratory rate      | 132 (4.8)                 | 647 (20.3)                   | 5.00 (4.12 to 6.08)                                  | 449 (19.6)   | 4.79 (3.91 to 5.87)                                                   | 0.96 (0.84 to 1.10) |
| Oxygen saturation     | 656 (24.0)                | 1,511 (47.3)                 | 2.84 (2.54 to 3.18)                                  | 960 (41.8)   | 2.27 (2.02 to 2.57)                                                   | 0.80 (0.72 to 0.89) |
| Blood pressure        | 888 (32.5)                | 1,580 (49.5)                 | 2.03 (1.83 to 2.26)                                  | 942 (41.0)   | 1.44 (1.29 to 1.62)                                                   | 0.71 (0.64 to 0.79) |
| Temperature           | 1,721 (63.0)              | 2,201 (68.9)                 | 1.30 (1.17 to 1.45)                                  | 1,752 (76.3) | 1.89 (1.67 to 2.14)                                                   | 1.45 (1.28 to 1.64) |
| AVPU**                | 0                         | 458 (14.3)                   | n/a                                                  | 274 (11.9)   | n/a                                                                   | 0.81 (0.69 to 0.95) |
| Weight                | 190 (7.0)                 | 715 (22.4)                   | 3.86 (3.26 to 4.57)                                  | 456 (19.9)   | 3.32 (2.77 to 3.97)                                                   | 0.86 (0.75 to 0.98) |
| Full set of vitals*** | 95 (3.5)                  | 516 (16.2)                   | 5.35 (4.27 to 6.70)                                  | 372 (16.2)   | 5.37 (4.25 to 6.77)                                                   | 1.01 (0.87 to 1.16) |

\*Odds ratios calculated with pretraining group as baseline odds.

<sup>^</sup>Odds ratios calculated for post-training group 2 with post-training 1 group as baseline odds.

\*\* AVPU assesses level of consciousness as either Alert, responds to Verbal stimuli, responds to Pain, Unresponsive. It is a system to assess the level of consciousness in a patient.

\*\*\*A full set of vitals for patients age 5 and over includes heart rate, respiratory rate, oxygen saturation, blood pressure and temperature. A full set of vitals for patients under age 5 includes heart rate, respiratory rate, oxygen saturation and temperature

Table 4 Documented vital signs measurement by age-group after initial training<sup>&</sup>

|                       | Age 0 - <5<br>(n=1,401) | Age 5 - <18<br>(n=1,214) | Age 18+<br>(n=2,801)                                    |              | Odds ratio <sup>^</sup> (95% CI)<br>compared to combined<br>age-group 0 - <18 |                     |
|-----------------------|-------------------------|--------------------------|---------------------------------------------------------|--------------|-------------------------------------------------------------------------------|---------------------|
|                       | n (%)                   | n (%)                    | Odds ratio* (95% CI)<br>compared to age-group<br>0 - <5 | n (%)        | Odds ratio* (95% CI)<br>compared to age-group<br>0 - <5                       |                     |
| Heart rate            | 517 (36.9)              | 526 (43.3)               | 1.31 (1.12 to 1.53)                                     | 1,849 (66)   | 3.32 (2.91 to 3.8)                                                            | 2.93 (2.62 to 3.27) |
| Respiratory rate      | 245 (17.5)              | 211 (17.4)               | 0.99 (0.81 to 1.22)                                     | 621 (22.2)   | 1.34 (1.14 to 1.58)                                                           | 1.35 (1.18 to 1.54) |
| Oxygen saturation     | 466 (33.3)              | 432 (35.6)               | 1.11 (0.94 to 1.30)                                     | 1,527 (54.5) | 2.4 (2.1 to 2.75)                                                             | 2.29 (2.05 to 2.56) |
| Blood pressure        | 167 (11.9)              | 399 (32.9)               | 3.62 (3 to 4.42)                                        | 1,904 (68)   | 15.68 (13.1 to 18.78)                                                         | 7.68 (6.8 to 8.68)  |
| Temperature           | 1,107 (79)              | 898 (74)                 | 0.75 (0.63 to 0.90)                                     | 1,898 (67.8) | 0.56 (0.48 to 0.65)                                                           | 0.64 (0.57 to 0.72) |
| AVPU**                | 149 (10.6)              | 142 (11.7)               | 1.11 (0.87 to 1.42)                                     | 418 (14.9)   | 1.47 (1.21 to 1.8)                                                            | 1.4 (1.19 to 1.64)  |
| Weight                | 528 (37.7)              | 304 (25)                 | 0.55 (0.47 to 0.65)                                     | 324 (11.6)   | 0.22 (0.18 to 0.25)                                                           | 0.28 (0.24 to 0.32) |
| Full set of vitals*** | 216 (15.4)              | 134 (11)                 | 0.58 (0.54 to 0.86)                                     | 520 (18.6)   | 1.25 (1.05 to 1.49)                                                           | 1.48 (1.27 to 1.71) |

<sup>&</sup>This includes all patients after post-training 1 and post-training 2, (excluding those in the pre-training, intermediate time period and those patients missing an age)

\*Odds ratios calculated with age-group 0-5 as baseline odds.

<sup>^</sup>Odds ratios calculated for combined age-group 18+ with combined age groups 0 - <5 and 5 - <18 as baseline odds.

\*\* AVPU- Alert, Verbal, Pain, Unresponsive. It is a system to assess the level of consciousness in a patient.

\*\*\*A full set of vitals for patients age 5 and over includes heart rate, respiratory rate, oxygen saturation, blood pressure and temperature. A full set of vitals for patients under age 5 includes heart rate, respiratory rate, oxygen saturation and temperature.

Table 5. Documented process outcomes by training group

|                                                                                                   | Pre-training      | Post-training 1   |                                               | Post-training 2   |                                               |                                                 |
|---------------------------------------------------------------------------------------------------|-------------------|-------------------|-----------------------------------------------|-------------------|-----------------------------------------------|-------------------------------------------------|
|                                                                                                   | n of total (%)    | n of total (%)    | Odds ratio* (95% CI) compared to pre-training | n of total (%)    | Odds ratio* (95% CI) compared to pre-training | Odds ratio^ (95%CI) compared to post-training 1 |
| Glucose test documented, among those with a neurologic chief complaint                            | 145 of 560 (25.9) | 254 of 672 (37.1) | 1.74 (1.36 to 2.22)                           | 169 of 469 (35.2) | 1.61 (1.23 to 2.11)                           | 0.93 (0.73 to 1.18)                             |
| <b>Antibiotics documented, among those with a final diagnosis of presumed bacterial infection</b> | 154 of 441 (34.8) | 415 of 478 (86.5) | 12.28 (8.83 to 17.07)                         | 335 of 388 (85.7) | 11.78 (8.30 to 16.71)                         | 0.96 (0.65 to 1.42)                             |
| Malaria test recorded, among those with a documented fever                                        | 139 of 229 (60.7) | 168 of 221 (76.0) | 2.05 (1.37 to 3.08)                           | 179 of 242 (74.0) | 1.84 (1.24 to 2.72)                           | 0.91 (0.59 to 1.38)                             |
| <b>Oxygen delivery recorded, among those with documented hypoxia</b>                              | 3 of 27 (11.1)    | 20 of 71 (28.2)   | 3.14 (0.85 to 11.59)                          | 15 of 42 (35.7)   | 4.44 (1.15 to 17.25)                          | 1.42 (0.63 to 3.20)                             |
| Repeat set of vital signs recorded, among those with initial shock vital signs**                  | 4 of 61 (6.6)     | 49 of 193 (25.4)  | 8.85 (1.67 to 14.06)                          | 34 of 135 (25.2)  | 4.80 (1.62 to 14.21)                          | 0.99 (0.60 to 1.64)                             |
| <b>IVF documented, among those with initial shock vital signs**</b>                               | 16 of 45 (35.6)   | 41 of 192 (21.4)  | 0.76 (0.39 to 1.49)                           | 23 of 135 (17.0)  | 0.58 (0.28 to 1.19)                           | 0.76 (0.43 to 1.33)                             |

\*Odds ratios calculated with pretraining group as baseline odds

^Odds ratios calculated for post-training 2 group with post-training group 1 as baseline odds.

\*\* Shock identified by appropriate vital signs according to age.

IVF = Intravenous fluids

## DISCUSSION

The study evaluated key quality process metrics before and after emergency care trainings at a rural Liberian hospital. Almost all metrics improved after clinical training compared to baseline, though additional gains were not seen with a second clinical training. Notably, patients who were triaged in the post-training time periods showed significant gains in having full sets of vital signs documented compared to patients in the same time period who were not triaged. Our study



1  
2  
3 supports clinical trainings and triage training and implementation as an important step in  
4  
5 improving care quality.  
6  
7  
8  
9

10 Training 1 resulted in a significant increase in the proportion of vital signs performed at JJD ED.  
11  
12 Before Training 1, few patients had full sets of vital signs documented. Vital signs are an  
13  
14 essential part of a patient's clinical evaluation, can detect serious illness, and help monitor for  
15  
16 clinical deterioration.<sup>23,25</sup> Post-training, the odds of having a full set of vitals increased five-fold.  
17  
18 Notably, patients who were triaged were nearly 16 times as likely to have a full set of vitals than  
19  
20 those who were not, suggesting that small interventions can improve emergency care.  
21  
22  
23  
24  
25

26 Despite these gains, few patients overall had a full set of vitals documented post-trainings  
27  
28 (16.2%). The reasons for this warrant further exploration and there are several likely contributing  
29  
30 factors. Due to the limited human resources, triage was inconsistently implemented. Without  
31  
32 triage and with limited overall staffing, vitals were performed by the providers themselves as  
33  
34 they evaluated patients. Due to the volume of patients and human resource constraints, anecdotal  
35  
36 reports suggest providers often only obtained partial or forwent vitals due to time pressure; in  
37  
38 addition, providers were observed to not consistently record vitals they obtained, particularly  
39  
40 when the ED was very busy. Staffing workload was likely exacerbated by patients boarding  
41  
42 within the ED. In the JJD ED, patients can stay for days if there is no space in the medical or  
43  
44 surgical wards or if the patient is deemed too critical for the wards. The hospital does not have an  
45  
46 ICU and the ED is the only clinical area where patients receive continuous visual observation  
47  
48 from providers. Additionally, equipment constraints likely impacted efficiency, as VS machines  
49  
50 are limited, and with intermittent electricity, automated machines were not always functional.  
51  
52  
53  
54  
55  
56  
57  
58  
59  
60

1  
2  
3 Similarly, limited availability of specific age-appropriate vital sign equipment may have led to  
4  
5  
6  
7  
8  
9  
10  
11  
12  
13  
14  
15  
16  
17  
18  
19  
20  
21  
22  
23  
24  
25  
26  
27  
28  
29  
30  
31  
32  
33  
34  
35  
36  
37  
38  
39  
40  
41  
42  
43  
44  
45  
46  
47  
48  
49  
50  
51  
52  
53  
54  
55  
56  
57  
58  
59  
60

Similarly, limited availability of specific age-appropriate vital sign equipment may have led to variability amongst age groups.

Large gains were seen in documented antibiotic administration among patients with presumed bacterial infections and in patients with shock receiving repeat vital signs. Patients presenting to the ED with a presumed bacterial infection were over 12 times more likely to have antibiotics documented after the initial emergency care training, and patients presenting to the ED in shock were nearly nine times more likely to have repeat vital signs documented. These significant gains have the potential to reduce morbidity and mortality from sepsis, a significant contribution to the burden of disease in LMICs.<sup>26,27</sup> These findings support that the expansion of limited emergency care trainings have the potential to improve the quality of emergency care provided by front-line providers and nurses.

The similarity of outcomes in the post-training 1 and 2 time periods may also be impacted by limitations of human resources and equipment. Staff turnover in the ED is relatively high.

Attrition meant that 31% of the participants in training 2 were receiving initial training rather than re-training, possibly limiting impact. Also, the presence of ED-trained supervisors was intermittent, limiting the exposure of the staff to daily supervision and mentorship to help fortify the training. In addition, several of the process metrics depended on the availability of supplies or equipment. Our findings likely reflect a need for comprehensive health system strengthening, of which training is only one component. Increases in overall health financing are also needed to expand the availability of staff and materials to improve patient care. Additionally, further evaluation is needed to identify the best ways for ongoing continuing medical education and staff

1  
2  
3 support. Aside from these explanations, the similarity of outcomes in post-training 1 and post-  
4 training 2 time periods could reflect that the additional training was necessary to ensure  
5 continued higher quality care and to keep metrics stable. If training 2 did not take place, it is  
6 possible the outcomes could have been worse, especially without daily supervision or  
7 mentorship.  
8  
9  
10  
11  
12  
13

## 14 15 16 17 **LIMITATIONS**

18  
19 This study's results must be considered within the context of its design. One notable limitation is  
20 our method of measuring process metrics was documentation by the ED care provider and not  
21 direct observation of whether the care was provided. Particularly in an understaffed environment  
22 with many competing clinical demands and without administrative processes to hold providers  
23 accountable for their documentation, documentation may lag behind actual performance of tasks.  
24 There is also the risk of bias where providers document inaccurately, however, we suspect that  
25 under-reporting was likely the larger contributor. In the local care context, care processes such as  
26 placing oxygen on the patient or giving IV fluids do not require an order and thus might not be  
27 documented in the patient chart.  
28  
29  
30  
31  
32  
33  
34  
35  
36  
37  
38  
39  
40  
41

42 Given data systems at the hospital, we relied on retrospective data entry from hand-written  
43 patient records. It is possible additional interventions or vital sign measurements were performed  
44 but not documented. There may be unknown missing patient data, due to mixed methods of chart  
45 documentation. There was potential for missing data in the month of June, which had less data  
46 points when compared to the remaining months. Second, although this study suggests the  
47 interventions are associated with increases in quality metrics, causality cannot be established. In  
48  
49  
50  
51  
52  
53  
54  
55  
56  
57  
58  
59  
60

1  
2  
3 addition, we cannot rule out confounding between metrics and/or unmeasured variables, for  
4  
5 example if increased rates of full sets of vital signs measured contributed to a higher likelihood  
6  
7 of receiving repeat vitals. Future studies should address this. Third, the study looked at  
8  
9 interventions as binary variables, but did not assess if the details of the intervention were  
10  
11 appropriate to an individual patient. Finally, this study was conducted at a single site in rural  
12  
13 Liberia that had not received any prior emergency care training and the generalizability of our  
14  
15 findings is unknown.  
16  
17  
18  
19  
20

## 21 CONCLUSION

22  
23 This study demonstrated an improvement in most process metrics after the implementation of  
24  
25 triage and emergency care training in rural Liberia, supporting the ability of short-course  
26  
27 interventions to improve facility-based care. This complements other evaluations of BEC  
28  
29 trainings, which demonstrated increased emergency care knowledge and confidence.<sup>17,18</sup>  
30  
31 However, additional gains were not seen with a re-training several months later. Further  
32  
33 exploration is needed to determine and intervene on other factors that influence quality metrics  
34  
35 as well as the best methods for ongoing continue medical education and staff support.  
36  
37  
38  
39  
40  
41

## 42 SUPPLEMENTARY MATERIALS

43  
44 **Supplementary Data:** This web only file has been produced by the BMJ Publishing Group from  
45  
46 an electronic file supplied by the author(s) and has not been edited for content.  
47  
48  
49  
50  
51  
52  
53  
54  
55  
56  
57  
58  
59  
60

## FOOTNOTES

**Contributors:** KT, ID, AP, VK, RHM, RC, SAR contributed to study design. KT, ID, AP, NL, VK, RHM, MH, AB, RC, SAR implemented the emergency care trainings. KT, ID, DD, TD, SM contributed to data collection. KT, ID, JG, PS, SAR contributed to data analysis. All authors contributed to interpretation of study results. KT and ID drafted the initial version of the manuscript. All authors contributed to the revision of the manuscript and have approved the final manuscript version. KT and ID were equal contributors. KT is responsible for this paper and content as a guarantor.

**Funding:** This work was funded by the Ansara Family Foundation; funders did not have any role in study design or the analysis or publication of results. There is not an award or grant number available.

**Competing interests:** None declared.

**Ethics Statement:** The study was approved by the Partners Healthcare IRB 2019P001944 as well as the University of Liberia-Pacific Institute for Research and Evaluation IRB 17-06-048 as part of the clinical and training protocol that Partners In Health Liberia submits annually for review. The IRB approved a Waiver of informed consent given the study was a chart review study, so informed consent was not obtained.

**Patient and Public Involvement:** Patients and/or the public were not involved in the design, conduct, reporting or dissemination plans of this research.

**Provenance and peer review:** Not commissioned; externally peer reviewed.

**Data Sharing Statement:** No data available. IRB does not allow sharing.

### Figure 1 Training Timeline 2019

## REFERENCES

1. Jamison DT, Gelband H, Horton S, et al. Disease Control Priorities: Improving Health and Reducing Poverty. Vol 9. 3<sup>rd</sup> ed. The World Bank; 2017.
2. Calvillo EJB, Broccoli M, Risko N, et al. Emergency care and health systems: consensus-based recommendations and future research priorities. *Acad Emerg Med*. 2013;20(12):1278-1288. DOI: 10.1111/acem.12266
3. Anderson PD, Suter RE, Mulligan T, et al. World health assembly resolution 60.22 and its importance as a health care policy tool for improving emergency care access and availability globally. *Ann Emerg Med*. 2012;60(1):35-44. DOI: 10.1016/j.annemergmed.2011.10.018. DOI: 10.1016/j.annemergmed.2011.10.018
4. Emergency care systems for universal health coverage: ensuring timely care for the acutely ill and injured. Seventy-Second World Health Assembly. May 28, 2019. Accessed November 5, 2020. <https://www.who.int/publications/i/item/emergency-care-systems-for-universal-health-coverage-ensuring-timely-care-for-the-acutely-ill-and-injured>
5. Razzak JA, Kellermann AL. Emergency medical care in developing countries: is it worthwhile?. *Bull World Health Organ*. 2002;80(11):900-905.
6. Anderson P. The globalization of emergency medicine and its importance for public health. *Bull World Health Organ*. 2006;84(10):835-838. DOI: 10.2471/blt.05.028548
7. Risko N, Chandra A, Burkholder TW, et al. Advancing research on the economic value of emergency care. *BMJ Glob Health*. 2019;4(6). DOI:10.1136/

1  
2  
3 bmjgh-2019-001768  
4  
5

- 6  
7 8. Thind A, Hsia R, Mabweijano J, et al. Essential Surgery: Disease Control Priorities. Vol 1.  
8  
9 3<sup>rd</sup> ed. The International Bank for Reconstruction and Development / The World Bank;  
10  
11 2015. Accessed November 9, 2020. <http://www.ncbi.nlm.nih.gov/books/NBK333513/>  
12  
13
- 14 9. Razzak J, Usmani MF, Bhutta ZA. Global, regional and national burden of emergency  
15  
16 medical diseases using specific emergency disease indicators: analysis of the 2015 global  
17  
18 burden of disease study. *BMJ Glob Health*. 2019;4(2). DOI:10.1136/bmjgh-2018-000733  
19  
20  
21
- 22 10. Gosselin R, Spiegel DA, Coughlin R, et al. Injuries: the neglected burden in developing  
23  
24 countries. *Bull World Health Organ*. 2009;87(4):246-246. DOI: 10.2471/BLT.08.052290  
25  
26  
27
- 28 11. *Basic Package for Health and Social Welfare Services for Liberia*. Ministry of Health and  
29  
30 Social Welfare Republic of Liberia. June 2008;42. Accessed November 5, 2020.  
31  
32 [http://liberiamohsw.org/Policies%20&%20Plans/Basic%20Package%20for%20Health%20](http://liberiamohsw.org/Policies%20&%20Plans/Basic%20Package%20for%20Health%20&%20Social%20Welfare%20for%20Liberia.pdf)  
33  
34 [&%20Social%20Welfare%20for%20Liberia.pdf](http://liberiamohsw.org/Policies%20&%20Plans/Basic%20Package%20for%20Health%20&%20Social%20Welfare%20for%20Liberia.pdf)  
35  
36  
37
- 38 12. Kruk ME, Rockers PC, Williams EH, et al. Availability of essential health services in post-  
39  
40 conflict Liberia. *Bull World Health Organ*. 2010;88(7):527-534. DOI:  
41  
42 10.2471/BLT.09.071068  
43  
44  
45
- 46 13. Hexom B, Calvello EJB, Babcock CA, et al. A model for emergency medicine education in  
47  
48 post-conflict Liberia. *Afr J Emerg Med*. 2012;2(4):143-150.  
49  
50  
51 DOI:10.1016/j.afjem.2012.08.006  
52  
53  
54  
55  
56  
57  
58  
59  
60

- 1  
2  
3 14. McQuilkin PA, Udhayashankar K, Niescierenko M, et al. Health-care access during the  
4  
5 Ebola virus epidemic in Liberia. *Am J Trop Med Hyg.* 2017;97(3):931-936. DOI:  
6  
7 10.4269/ajtmh.16-0702  
8  
9
- 10  
11 15. Downie R. The Road to Recovery: Rebuilding Liberia's Health System. Center for Strategic  
12  
13 and International Studies: August 2012;24. Accessed November 5, 2020. [https://csis-](https://csis-website-prod.s3.amazonaws.com/s3fs-public/legacy_files/files/publication/120822_Downie_RoadtoRecovery_web.pdf)  
14  
15 [website-prod.s3.amazonaws.com/s3fs-](https://csis-website-prod.s3.amazonaws.com/s3fs-public/legacy_files/files/publication/120822_Downie_RoadtoRecovery_web.pdf)  
16  
17 [public/legacy\\_files/files/publication/120822\\_Downie\\_RoadtoRecovery\\_web.pdf](https://csis-website-prod.s3.amazonaws.com/s3fs-public/legacy_files/files/publication/120822_Downie_RoadtoRecovery_web.pdf)  
18  
19
- 20  
21 16. Mitchell R, McKup JJ, Bue O, et al. Implementation of a novel three-tier triage tool in Papua  
22  
23 New Guinea: a model for resource-limited emergency departments. *Lancet Reg Health -*  
24  
25 *West Pac.* 2020;5:100051. DOI: 10.1016/j.lanwpc.2020.100051  
26  
27
- 28  
29 17. Olufadeji A, Usoro A, Akubueze CE, et al. Results from the implementation of the World  
30  
31 Health Organization basic emergency care course in Lagos, Nigeria. *Afr J Emerg Med.*  
32  
33 2021;11(2):231-236. DOI: 10.1016/j.afjem.2021.02.004  
34  
35
- 36  
37 18. Kivlehan SM, Dixon J, Kalanzi J, et al. Strengthening emergency care knowledge and skills  
38  
39 in Uganda and Tanzania with the WHO-ICRC basic emergency care course. *Emerg Med J.*  
40  
41 2021;38(8):636-642. DOI: 10.1136/emered-2020-209718  
42  
43
- 44  
45 19. WHO Standardized Clinical Form. World Health Organization. January 14, 2020. Accessed  
46  
47 April 1, 2022. <https://www.who.int/publications/i/item/who-standardized-clinical-form>  
48  
49
- 50  
51 20. Broccoli MC, Moresky R, Dixon J, et al. Defining quality indicators for emergency care  
52  
53 delivery: findings of an expert consensus process by emergency care practitioners in Africa.  
54  
55 *BMJ Glob Health.* 2018;3(1):e000479. DOI: 10.1136/bmjgh-2017-000479  
56  
57  
58  
59



- 1  
2  
3 21. Aaronson EL, Marsh RH, Guha M, et al. Emergency department quality and safety indicators  
4 in resource-limited settings: an environmental survey. *Int J Emerg Med.* 2015;8(1):39. DOI  
5 10.1186/s12245-015-0088-x  
6  
7  
8  
9  
10  
11 22. Cooper RJ, Schriger DL, Flaherty HL, et al. Effect of vital signs on triage decisions. *Ann*  
12 *Emerg Med.* 2002;39(3):223-232. DOI: 10.1067/mem.2002.121524  
13  
14  
15  
16 23. DeVita MA, Hillman K, Bellomo R, et al. Textbook of Rapid Response Systems: Concept  
17 and Implementation. Springer International Publishing; 2017.  
18  
19  
20  
21  
22 24. *StataCorp.* 2017. *Stata Statistical Software: Release 15.* College Station, TX: *StataCorp*  
23 *LLC.*  
24  
25  
26  
27  
28 25. Brekke IJ, Puntervoll LH, Pedersen PB, et al. The value of vital sign trends in predicting and  
29 monitoring clinical deterioration: A systematic review. *PLoS ONE.* 2019;14(1). DOI:  
30 10.1371/journal.pone.0210875  
31  
32  
33  
34  
35  
36 26. Vos T, Lim SS, Abbafati C, et al. Global burden of 369 diseases and injuries in 204 countries  
37 and territories, 1990–2019: a systematic analysis for the global burden of disease study  
38 2019. *The Lancet.* 2020;396(10258):1204-1222. DOI: 10.1016/S0140-6736(20)30925-9  
39  
40  
41  
42  
43  
44 27. Stephen AH, Montoya RL, Aluisio AR. Sepsis and Septic Shock in Low- and Middle-  
45 Income Countries. *Surg Infect.* 2020;21(7):571-578. DOI: 10.1089/sur.2020.047  
46  
47  
48  
49  
50  
51  
52  
53  
54  
55  
56  
57  
58  
59  
60

1  
2  
3  
4  
5  
6  
7  
8  
9  
10  
11  
12  
13  
14  
15  
16  
17  
18  
19  
20  
21  
22  
23  
24  
25  
26  
27  
28  
29  
30  
31  
32  
33  
34  
35  
36  
37  
38  
39  
40  
41  
42  
43  
44  
45  
46  
47  
48  
49  
50  
51  
52  
53  
54  
55  
56  
57  
58  
59  
60

Figure 1. Training Timeline 2019

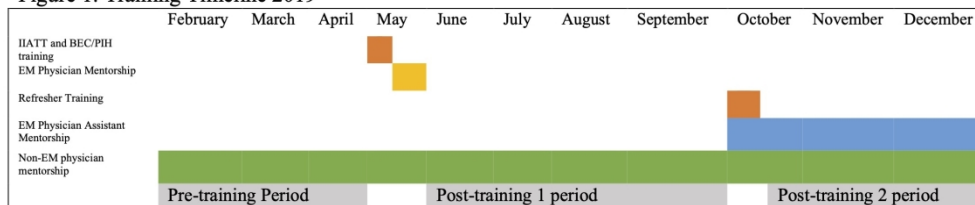

Figure 1 Training Timeline 2019

791x192mm (72 x 72 DPI)

STROBE Statement—Checklist of items that should be included in reports of *cross-sectional studies*

|                              | Item No | Recommendation                                                                                                                                                                                    | Page No |
|------------------------------|---------|---------------------------------------------------------------------------------------------------------------------------------------------------------------------------------------------------|---------|
| <b>Title and abstract</b>    | 1       | (a) Indicate the study's design with a commonly used term in the title or the abstract                                                                                                            | 1       |
|                              |         | (b) Provide in the abstract an informative and balanced summary of what was done and what was found                                                                                               | 1-2     |
| <b>Introduction</b>          |         |                                                                                                                                                                                                   |         |
| Background/rationale         | 2       | Explain the scientific background and rationale for the investigation being reported                                                                                                              | 3-4     |
| Objectives                   | 3       | State specific objectives, including any prespecified hypotheses                                                                                                                                  | 4       |
| <b>Methods</b>               |         |                                                                                                                                                                                                   |         |
| Study design                 | 4       | Present key elements of study design early in the paper                                                                                                                                           | 4       |
| Setting                      | 5       | Describe the setting, locations, and relevant dates, including periods of recruitment, exposure, follow-up, and data collection                                                                   | 4-6     |
| Participants                 | 6       | (a) Give the eligibility criteria, and the sources and methods of selection of participants                                                                                                       | 6-7     |
| Variables                    | 7       | Clearly define all outcomes, exposures, predictors, potential confounders, and effect modifiers. Give diagnostic criteria, if applicable                                                          | 7-8     |
| Data sources/<br>measurement | 8*      | For each variable of interest, give sources of data and details of methods of assessment (measurement). Describe comparability of assessment methods if there is more than one group              | 7-8     |
| Bias                         | 9       | Describe any efforts to address potential sources of bias                                                                                                                                         | 16-17   |
| Study size                   | 10      | Explain how the study size was arrived at                                                                                                                                                         | 10      |
| Quantitative variables       | 11      | Explain how quantitative variables were handled in the analyses. If applicable, describe which groupings were chosen and why                                                                      | 7-8     |
| Statistical methods          | 12      | (a) Describe all statistical methods, including those used to control for confounding                                                                                                             | 9       |
|                              |         | (b) Describe any methods used to examine subgroups and interactions                                                                                                                               | 9       |
|                              |         | (c) Explain how missing data were addressed                                                                                                                                                       | 7       |
|                              |         | (d) If applicable, describe analytical methods taking account of sampling strategy                                                                                                                | N/A     |
|                              |         | (e) Describe any sensitivity analyses                                                                                                                                                             | N/A     |
| <b>Results</b>               |         |                                                                                                                                                                                                   |         |
| Participants                 | 13*     | (a) Report numbers of individuals at each stage of study—eg numbers potentially eligible, examined for eligibility, confirmed eligible, included in the study, completing follow-up, and analysed | 10      |
|                              |         | (b) Give reasons for non-participation at each stage                                                                                                                                              | 10      |
|                              |         | (c) Consider use of a flow diagram                                                                                                                                                                |         |
| Descriptive data             | 14*     | (a) Give characteristics of study participants (eg demographic, clinical, social) and information on exposures and potential confounders                                                          | 10      |
|                              |         | (b) Indicate number of participants with missing data for each variable of interest                                                                                                               | 10      |
| Outcome data                 | 15*     | Report numbers of outcome events or summary measures                                                                                                                                              | 10-11   |

|    |                          |    |                                                                                                                                                                                                              |
|----|--------------------------|----|--------------------------------------------------------------------------------------------------------------------------------------------------------------------------------------------------------------|
| 1  |                          |    |                                                                                                                                                                                                              |
| 2  | Main results             | 16 | (a) Give unadjusted estimates and, if applicable, confounder-adjusted estimates and their precision (eg, 95% confidence interval). Make clear which confounders were adjusted for and why they were included |
| 3  |                          |    | 10-                                                                                                                                                                                                          |
| 4  |                          |    | 11                                                                                                                                                                                                           |
| 5  |                          |    |                                                                                                                                                                                                              |
| 6  |                          |    | (b) Report category boundaries when continuous variables were categorized                                                                                                                                    |
| 7  |                          |    | 10-                                                                                                                                                                                                          |
| 8  |                          |    | 11                                                                                                                                                                                                           |
| 9  |                          |    | (c) If relevant, consider translating estimates of relative risk into absolute risk for a meaningful time period                                                                                             |
| 10 |                          |    | N/A                                                                                                                                                                                                          |
| 11 | Other analyses           | 17 | Report other analyses done—eg analyses of subgroups and interactions, and sensitivity analyses                                                                                                               |
| 12 |                          |    | 10                                                                                                                                                                                                           |
| 13 |                          |    |                                                                                                                                                                                                              |
| 14 | <b>Discussion</b>        |    |                                                                                                                                                                                                              |
| 15 | Key results              | 18 | Summarise key results with reference to study objectives                                                                                                                                                     |
| 16 |                          |    | 13-                                                                                                                                                                                                          |
| 17 |                          |    | 16                                                                                                                                                                                                           |
| 18 | Limitations              | 19 | Discuss limitations of the study, taking into account sources of potential bias or imprecision. Discuss both direction and magnitude of any potential bias                                                   |
| 19 |                          |    | 16-                                                                                                                                                                                                          |
| 20 |                          |    | 17                                                                                                                                                                                                           |
| 21 | Interpretation           | 20 | Give a cautious overall interpretation of results considering objectives, limitations, multiplicity of analyses, results from similar studies, and other relevant evidence                                   |
| 22 |                          |    | 17                                                                                                                                                                                                           |
| 23 |                          |    |                                                                                                                                                                                                              |
| 24 | Generalisability         | 21 | Discuss the generalisability (external validity) of the study results                                                                                                                                        |
| 25 |                          |    | 17                                                                                                                                                                                                           |
| 26 |                          |    |                                                                                                                                                                                                              |
| 27 | <b>Other information</b> |    |                                                                                                                                                                                                              |
| 28 | Funding                  | 22 | Give the source of funding and the role of the funders for the present study and, if applicable, for the original study on which the present article is based                                                |
| 29 |                          |    | 9                                                                                                                                                                                                            |
| 30 |                          |    |                                                                                                                                                                                                              |
| 31 |                          |    |                                                                                                                                                                                                              |
| 32 |                          |    |                                                                                                                                                                                                              |

\*Give information separately for exposed and unexposed groups.

**Note:** An Explanation and Elaboration article discusses each checklist item and gives methodological background and published examples of transparent reporting. The STROBE checklist is best used in conjunction with this article (freely available on the Web sites of PLoS Medicine at <http://www.plosmedicine.org/>, Annals of Internal Medicine at <http://www.annals.org/>, and Epidemiology at <http://www.epidem.com/>). Information on the STROBE Initiative is available at [www.strobe-statement.org](http://www.strobe-statement.org).

# BMJ Open

## Evaluation of Emergency Care Education and Triage Implementation: an observational study at a hospital in rural Liberia

|                                 |                                                                                                                                                                                                                                                                                                                                                                                                                                                                                                                                                                                                                                                                                                                                                                                                                                                                                                                                                                                           |
|---------------------------------|-------------------------------------------------------------------------------------------------------------------------------------------------------------------------------------------------------------------------------------------------------------------------------------------------------------------------------------------------------------------------------------------------------------------------------------------------------------------------------------------------------------------------------------------------------------------------------------------------------------------------------------------------------------------------------------------------------------------------------------------------------------------------------------------------------------------------------------------------------------------------------------------------------------------------------------------------------------------------------------------|
| Journal:                        | <i>BMJ Open</i>                                                                                                                                                                                                                                                                                                                                                                                                                                                                                                                                                                                                                                                                                                                                                                                                                                                                                                                                                                           |
| Manuscript ID                   | bmjopen-2022-067343.R1                                                                                                                                                                                                                                                                                                                                                                                                                                                                                                                                                                                                                                                                                                                                                                                                                                                                                                                                                                    |
| Article Type:                   | Original research                                                                                                                                                                                                                                                                                                                                                                                                                                                                                                                                                                                                                                                                                                                                                                                                                                                                                                                                                                         |
| Date Submitted by the Author:   | 10-Jan-2023                                                                                                                                                                                                                                                                                                                                                                                                                                                                                                                                                                                                                                                                                                                                                                                                                                                                                                                                                                               |
| Complete List of Authors:       | Towns, Kathleen; University of Michigan Michigan Medicine, Internal Medicine; Partners In Health<br>Dolo, Isaac; Partners In Health Liberia<br>Pickering, Ashley; University of Colorado - Anschutz Medical Campus, CO, USA<br>Ludmer, Nicholas; University of Illinois Chicago Department of Emergency Medicine; Partners In Health<br>Karanja, Viola; Partners In Health Liberia<br>Marsh, Regan H ; Harvard Medical School; Partners In Health<br>Horace, Minnie; McGill University<br>Dweh, Denny; Partners In Health Liberia<br>Dalieh, Tresa; Partners In Health Liberia<br>Myers, Sharon; Partners In Health Liberia<br>Bukhman, Alice; Harvard Medical School; Partners In Health<br>Gashi, Jason; Boston University<br>Sonenthal, Paul; Harvard Medical School; Partners In Health<br>Ulysse, Patrick; Partners In Health; Partners In Health Liberia<br>Cook, Rebecca; Harvard Medical School; Partners In Health<br>Rouhani, Shada; Harvard Medical School; Partners In Health |
| <b>Primary Subject Heading</b>: | Emergency medicine                                                                                                                                                                                                                                                                                                                                                                                                                                                                                                                                                                                                                                                                                                                                                                                                                                                                                                                                                                        |
| Secondary Subject Heading:      | Emergency medicine, Global health                                                                                                                                                                                                                                                                                                                                                                                                                                                                                                                                                                                                                                                                                                                                                                                                                                                                                                                                                         |
| Keywords:                       | ACCIDENT & EMERGENCY MEDICINE, EDUCATION & TRAINING (see Medical Education & Training), MEDICAL EDUCATION & TRAINING                                                                                                                                                                                                                                                                                                                                                                                                                                                                                                                                                                                                                                                                                                                                                                                                                                                                      |
|                                 |                                                                                                                                                                                                                                                                                                                                                                                                                                                                                                                                                                                                                                                                                                                                                                                                                                                                                                                                                                                           |

SCHOLARONE™  
Manuscripts

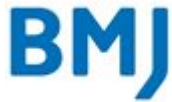

I, the Submitting Author has the right to grant and does grant on behalf of all authors of the Work (as defined in the below author licence), an exclusive licence and/or a non-exclusive licence for contributions from authors who are: i) UK Crown employees; ii) where BMJ has agreed a CC-BY licence shall apply, and/or iii) in accordance with the terms applicable for US Federal Government officers or employees acting as part of their official duties; on a worldwide, perpetual, irrevocable, royalty-free basis to BMJ Publishing Group Ltd ("BMJ") its licensees and where the relevant Journal is co-owned by BMJ to the co-owners of the Journal, to publish the Work in this journal and any other BMJ products and to exploit all rights, as set out in our [licence](#).

The Submitting Author accepts and understands that any supply made under these terms is made by BMJ to the Submitting Author unless you are acting as an employee on behalf of your employer or a postgraduate student of an affiliated institution which is paying any applicable article publishing charge ("APC") for Open Access articles. Where the Submitting Author wishes to make the Work available on an Open Access basis (and intends to pay the relevant APC), the terms of reuse of such Open Access shall be governed by a Creative Commons licence – details of these licences and which [Creative Commons](#) licence will apply to this Work are set out in our licence referred to above.

Other than as permitted in any relevant BMJ Author's Self Archiving Policies, I confirm this Work has not been accepted for publication elsewhere, is not being considered for publication elsewhere and does not duplicate material already published. I confirm all authors consent to publication of this Work and authorise the granting of this licence.

1  
2  
3  
4  
5  
6  
7  
8  
9  
10  
11  
12  
13  
14  
15  
16 Evaluation of Emergency Care Education and Triage Implementation: an observational study at a  
17 hospital in rural Liberia  
18

19  
20 Towns, Kathleen (0000-0003-2017-0229)\*<sup>1,2</sup>, Dolo, Isaac\*<sup>3</sup>, Pickering, Ashley<sup>4</sup>, Ludmer,  
21 Nicholas<sup>2,5</sup>, Karanja, Viola<sup>3</sup>, Marsh, Regan H.<sup>2,6</sup>, Horace, Minnie<sup>7</sup>, Dweh, Denny<sup>3</sup>, Dalieh,  
22 Tresa<sup>3</sup>, Myers, Sharon<sup>3</sup>, Bukhman, Alice<sup>2,6</sup>, Gashi, Jason<sup>8</sup>, Sonenthal, Paul<sup>2,6</sup>, Ulysse, Patrick<sup>2,3</sup>,  
23 Cook, Rebecca<sup>2,6</sup>, Rouhani, Shada A.<sup>2,6</sup>  
24

25 \*Co-first authors  
26

27 <sup>1</sup>University of Michigan, Ann Arbor, MI, USA

28 <sup>2</sup>Partners In Health, Boston, MA, USA

29 <sup>3</sup>Partners In Health, Liberia

30 <sup>4</sup>University of Colorado Anschutz Medical Campus, Aurora, CO, USA

31 <sup>5</sup>University of Chicago, Chicago, IL, USA

32 <sup>6</sup>Harvard Medical School, Boston, MA, USA

33 <sup>7</sup>McGill University, Montreal, Canada

34 <sup>8</sup>Boston University, Boston, MA, USA  
35  
36  
37

38 Correspondence to: Kathleen Towns; [katrobin@med.umich.edu](mailto:katrobin@med.umich.edu)  
39

40 Word Count: 3,225  
41  
42  
43  
44  
45  
46  
47  
48  
49  
50  
51  
52  
53  
54  
55  
56  
57  
58  
59  
60

## ABSTRACT

### Introduction

In Liberia, emergency care is still in its early development. In 2019, two emergency care and triage education sessions were done at J. J. Dossen Hospital in Southeastern Liberia. The observational study objectives evaluated key process outcomes before and after the educational interventions.

### Methods

Emergency Department paper records from February 1, 2019 to December 31, 2019 were retrospectively reviewed. Simple descriptive statistics were used to describe patient demographics and Chi-Square analyses were used to test for significance. Odds ratios were calculated for key pre-determined process measures.

### Results

There were 8,222 patient visits recorded that were included in our analysis. Patients in the post-intervention 1 group had higher odds of having a documented full set of vital signs compared to the baseline group (16% v 3.5%, OR 5.4 (95% CI 4.3 to 6.7)). After triage implementation, patients who were triaged were 16 times more likely to have a full set of vitals compared to those who were not triaged. Similarly, compared to the baseline group, patients in the post-intervention 1 group had higher odds of having a glucose documented if they presented with altered mental status or a neurologic complaint (37% v 30%, OR 1.7 (CI 1.3 to 2.2)), documented antibiotic administration if they had a presumed bacterial infection (87% v 35%, OR 12.8 (CI 8.8 to 17.1)),



1  
2  
3 documented malaria test if presenting with fever (76% v 61%, OR 2.05 (CI 1.37 to 3.08)) or  
4  
5 documented repeat set of vitals if presenting with shock (25% v 6.6%, OR 8.85 (CI 1.67 to  
6  
7 14.06)). There was no significant difference in the above process outcomes between the  
8  
9 education interventions.  
10  
11  
12  
13

## 14 **Conclusion**

15  
16  
17 This study showed improvement in most process measures between the baseline and post-  
18  
19 intervention 1 groups, benefits that persisted post-intervention 2, thus supporting the importance  
20  
21 of short-course education interventions to durably improve facility-based care.  
22  
23  
24  
25

## 26 **Strengths and Limitations of this study**

- 27  
28 • **This study contributes to limited research on educational interventions in LMICs --**  
29  
30 **where emergency care is in its infancy – by evaluating changes in care processes as a**  
31  
32 **result of educational interventions.**
- 33  
34 • **This study evaluated both pediatric and adult populations which fully represents the**  
35  
36 **patient population presenting to the emergency department.**
- 37  
38 • **This is an observational cross-sectional study, so causality cannot be established.**
- 39  
40 • **This is a single center study and generalizability of results is unknown.**
- 41  
42 • **The study design retrospectively reviewed documents and did not include direct**  
43  
44 **observations which may not fully represent actual practice.**
- 45  
46  
47  
48  
49  
50  
51  
52  
53  
54  
55  
56  
57  
58  
59  
60

## INTRODUCTION

Emergency care has been increasingly recognized as a fundamental component to strengthening health systems<sup>1-5</sup> and an effective means to address multiple Sustainable Development Goals and reduce the overall burden of disease.<sup>1,6</sup> An estimated 54% of annual deaths in low and middle-income countries (LMICs) could be addressed by pre-hospital and hospital-based emergency care.<sup>7</sup> More specifically, injury related mortality disproportionately affects LMICs, and accounts for more than 90% of the total global mortality related to injury.<sup>8</sup> Timely emergency care saves lives across the spectrum of illness from injuries to acute presentations of chronic disease and is the first contact with the health system for many individuals.<sup>1-2,9-10</sup>

Emergency care in Liberia, like many LMICs, is still in its early development. In 2007, emergency care was first included in Liberia's national health plan and basic package of health services.<sup>11,12</sup> There has been some development of emergency education at the national referral hospital in the capital of Monrovia; however, no other consistent or standardized emergency medicine curriculum has been established.<sup>13</sup> The basic package of health services outlines the essentials of emergency care for each level of service.<sup>11</sup> Currently, there are no formal indicators measuring care or process outcomes for emergency care nationally.

In 2014, the Ebola outbreak led to the near-collapse of the country's already weakened health system, which was recovering from recent civil war (1989-1996 and 1999-2003).<sup>13-15</sup> In 2015, responding to the Ebola epidemic, the global non-profit organization Partners In Health (PIH), at the invitation of and in partnership with the Liberian government, came to Liberia to support the emergency response and long-term strengthening of the health system. Given clear emergency

1  
2  
3 care needs in Maryland County, a key goal of PIH's became to expand and strengthen  
4  
5 emergency services, which included developing the health workforce capacity to provide high-  
6  
7 quality emergency care with the support of emergency care education sessions and triage  
8  
9 implementation. The objective of this observational study was to evaluate key process outcomes  
10  
11 before and after triage implementation and emergency care education interventions to assess its  
12  
13 impact on quality of care and identify areas for future improvement.  
14  
15  
16  
17  
18

## 19 **METHODS**

### 20 **Study Design**

21  
22 An observational, retrospective cross-sectional study of patients presenting to a regional hospital  
23  
24 ED in Southeastern Liberia.  
25  
26  
27  
28  
29

### 30 **Study Setting**

31  
32 The observational study was carried out at JJD, the only county referral hospital in rural,  
33  
34 Southeastern Liberia. It is a government-run hospital supported by PIH and provides services  
35  
36 free of charge. JJD serves a primary catchment area of 187,000 people in Maryland county, and  
37  
38 receives additional referrals from neighboring counties.<sup>16</sup> At the time of the education  
39  
40 interventions, JJD's 8-bed ED was primarily staffed by nurses and physician's assistant. There  
41  
42 was no trained emergency medicine physician at the hospital. Specialists in the four core clinical  
43  
44 departments of pediatrics, internal medicine, surgery and obstetrics and gynecology provide  
45  
46 back-up clinical support to the ED in their respective clinical areas as needed. Prior to 2019,  
47  
48 none of the ED staff had specific emergency care education courses. In addition to nurses and  
49  
50  
51  
52  
53  
54  
55  
56  
57  
58  
59  
60

1  
2  
3 PAs, nursing aides and nursing students worked within the ED; after triage was implemented in  
4  
5 May 2019, nursing aides primarily staffed ED triage.  
6  
7  
8  
9

### 10 **Education Interventions**

11  
12 A series of education interventions were undertaken with ED staff, that included both nurses and  
13  
14 physician assistants, to train them on the implementation of the Integrated Interagency Triage Tool  
15  
16 (IIATT) and completion of the WHO Basic Emergency Care course. For the first intervention, a  
17  
18 series of education sessions were conducted to improve emergency care at JJD in late April and  
19  
20 early May 2019. First, staff were trained on the WHO-ICRC-MSF integrated interagency triage  
21  
22 tool through didactics followed by real-time supervision and mentorship on the implementation  
23  
24 of triage.<sup>17-19</sup> Triage is an essential component of emergency care; it evaluates a patient's acuity  
25  
26 and prioritizes evaluation and treatment based on the severity of the patient's condition.<sup>6</sup> The  
27  
28 IIATT assigns patients to a 3-tier acuity system, based on specified symptoms, physical signs,  
29  
30 and high risk vital signs.<sup>17-19</sup>  
31  
32  
33  
34  
35  
36  
37

38 Following the IIATT training, 12 staff received 2 weeks of education on the WHO Basic  
39  
40 Emergency Care (BEC) course, followed by the complementary PIH Fundamentals of  
41  
42 Emergency Care training. The WHO BEC course was composed of didactic, small group  
43  
44 sessions and skills session, designed to train staff to identify and manage acute illnesses and  
45  
46 injuries with limited resources.<sup>20,21</sup> The supplemental PIH course included additional topics (eg.  
47  
48 approach to conditions such as abdominal pain and fevers), and skills such as basic EKG and  
49  
50 ultrasound. The didactic courses were followed by two weeks of clinical mentorship by a visiting  
51  
52  
53  
54  
55  
56  
57  
58  
59  
60

1  
2  
3 faculty emergency physician. Afterwards, ongoing occasional clinical mentorship was supported  
4  
5 by non-EM faculty who worked at JJD.  
6  
7  
8  
9

10 In mid-October 2019, 16 JJD staff participated in a three-day refresher education session. Five  
11  
12 participants had not completed the initial education intervention, so received a pre-course one-  
13  
14 day intensive training on key concepts covered previously. An emergency physician assistant  
15  
16 provided ongoing clinical mentorship 4 days a week for the subsequent 3 months.  
17  
18  
19  
20

### 21 **Study Population**

22  
23 The study was conducted from February 1, 2019 to December 31, 2019. During this period, all  
24  
25 patients presenting to the JJD ED for whom a visit was either documented in the ED ledger or a  
26  
27 separate paper chart were included in the study.  
28  
29  
30  
31  
32

### 33 **Data Collection**

34  
35 Trained data collectors extracted information from the paper ED records into a pre-developed  
36  
37 data extraction tool. Prior to May 2019, all initial visit documentation occurred exclusively in the  
38  
39 ED ledger, including demographics, reason for the visit, vital signs, lab testing, key results,  
40  
41 diagnosis, and disposition. After May 2019, documentation included three sources: the ED  
42  
43 ledger, an ED triage form, and a ED provider documentation form adapted from the WHO  
44  
45 Emergency Unit forms.<sup>22</sup> These forms were introduced in May 2019 and used by staff  
46  
47 performing the initial evaluation and resuscitation. The ED ledger was a bound book with paper  
48  
49 records, described above. The ED triage form documented triage acuity based on presenting  
50  
51 symptoms and vital signs based on the interagency integrated triage tool. The ED provider  
52  
53  
54  
55  
56  
57  
58  
59  
60

1  
2  
3 documentation form included sections for vital signs, chief complaint, primary survey, history of  
4 presenting illness, review of systems, past medical history, assessment, and plan. Data collectors  
5 reviewed all these source and recorded demographics, initial vital signs, select clinical process  
6 measures and outcome variables.  
7  
8  
9  
10  
11  
12  
13  
14

### 15 **Variables and Outcomes**

16  
17 We classified visits from February 1, 2019 to April 30, 2019 as “pre-intervention”, visits from  
18 May 29, 2019 to October 13, 2019 as “post-intervention 1”, and October 21, 2019 to December  
19 31, 2019 as “post-intervention 2.” Visits from May 1, 2019 to May 28, 2019 and October 14,  
20 2019 to October 20, 2019 were considered to be in “intermediate” time periods (e.g., time  
21 periods during the education sessions themselves) and excluded from comparative analyses (as  
22 seen in figure 1). Data with missing date and age variables were also excluded from the analysis.  
23  
24  
25  
26  
27  
28  
29  
30  
31  
32

33 Due to differences in documentation standards prior to the ED education session, we focused our  
34 analyses on variables and process metrics that were reliably and routinely captured in the JJD ED  
35 register. The study team reviewed process metrics recommended by the African Federation of  
36 Emergency Medicine, as well as a review of quality metrics used in LMIC EDs.<sup>23,24</sup> From these  
37 lists, study outcomes were chosen based on local context, hospital and government priorities, and  
38 pre-existing documentation patterns that determined what baseline data was available. Outcomes  
39 focused primarily on the effectiveness domain of quality of care.<sup>25</sup> The primary study outcome  
40 was a complete set of recorded vital signs at any time during the patient’s ED visit and was  
41 chosen given the importance of vital signs to triage and emergency care.<sup>26,27</sup> A full set of vitals  
42 for patients age 5 and over includes heart rate, respiratory rate, oxygen saturation, blood pressure  
43  
44  
45  
46  
47  
48  
49  
50  
51  
52  
53  
54  
55  
56  
57  
58  
59  
60

1  
2  
3 and temperature. A full set of vitals for patients under age 5 includes heart rate, respiratory rate,  
4 oxygen saturation and temperature. Blood pressure was not reliably recorded in this younger age  
5 group so was not included.  
6  
7  
8  
9

10  
11  
12 Secondary outcomes examined included documentation of: blood glucose for patients presenting  
13 with altered mental status or a neurologic complaint; antibiotic administration or prescription in  
14 patients with a presumed bacterial infection; malaria diagnostic testing in patients with  
15 temperature  $\geq 38^{\circ}\text{C}$ ; oxygen administration for hypoxia; repeat vital signs for shock; and  
16 intravenous fluids for shock (hypoxia and shock were defined by age, Table 1). A physician  
17 assistant interpreted the final diagnoses to determine if the visit was due to a presumed bacterial  
18 infection. In the absence of microbiology capability to perform cultures and accounting for local  
19 context and practice patterns, all diagnoses of pneumonia, urinary tract infections, meningitis,  
20 cellulitis, and sepsis were presumed to have been bacterial. Tuberculosis (TB) was excluded  
21 from the list of bacterial infections, as TB patients are referred to TB clinic to initiate treatment  
22 and therefore not reliably documented as part of ED care. A patient was coded as a neurologic  
23 complaint if the clinical documentation included altered mental status, weakness, dizziness, or  
24 seizures.  
25  
26  
27  
28  
29  
30  
31  
32  
33  
34  
35  
36  
37  
38  
39  
40  
41  
42  
43  
44  
45  
46  
47  
48  
49  
50  
51  
52  
53  
54  
55  
56  
57  
58  
59  
60

|                                                                                                                 |                                                           |
|-----------------------------------------------------------------------------------------------------------------|-----------------------------------------------------------|
| Hypoxia                                                                                                         |                                                           |
| Age $\leq$ 5 years                                                                                              | SpO <sub>2</sub> $\leq$ 94%                               |
| Age > 5 years                                                                                                   | SpO <sub>2</sub> $\leq$ 92%                               |
| Fever                                                                                                           | temperature $\geq$ 38°C                                   |
| Shock Vitals                                                                                                    |                                                           |
| Age 0 to < 1 years*                                                                                             | HR > 160bpm                                               |
| Age $\geq$ 1 to < 3 years*                                                                                      | HR > 160bpm                                               |
| Age $\geq$ 3 to < 5 years*                                                                                      | HR > 140bpm                                               |
| Age $\geq$ 5 to < 13 years                                                                                      | HR of $\geq$ 130bpm or a systolic blood pressure < 70mmHg |
| Age $\geq$ 13 years                                                                                             | HR of $\geq$ 130bpm or a systolic blood pressure < 80mmHg |
| *Note: Blood pressure was not included as a criterion in the younger age groups as it is not reliably recorded. |                                                           |

## Data Analysis

Data was transcribed into Excel, then imported into and analyzed with Stata (Version 15).<sup>28</sup>

Simple descriptive statistics were used to describe the patient demographics and Chi-Square analyses were used to test for significance using a nominal threshold of 0.05. Odds ratios and 95% confidence intervals were calculated for pre-determined process measurements as described above.

## Patient and Public Involvement

Patients and/or the public were not involved in the design, conduct, reporting or dissemination plans of this research.



## RESULTS

There were 8,774 patient visits recorded in the JJD ED from February 1, 2019 to December 31, 2019 and included in our analysis: 2,732 in the pre-intervention time period, 3,194 in the ‘post-intervention 1’ time period, 2,296 in the ‘post-intervention 2’ time period, and 552 in the ‘indeterminate’ time periods, which were excluded from the analysis (Table 2).

| Age [Years] | Male<br>n (%) | Female<br>n (%) | Gender Missing<br>n (%) | Total<br>n (%) |
|-------------|---------------|-----------------|-------------------------|----------------|
| 0 - <5      | 1,102 (52.9)  | 954 (45.8)      | 29 (1.4)                | 2,085 (25.4)   |
| 5 - <18     | 858 (47.6)    | 917 (50.9)      | 26 (1.4)                | 1,801 (21.9)   |
| 18+         | 2,015 (47.6)  | 2,183 (51.6)    | 36 (0.9)                | 4,234 (51.5)   |
| Age Missing | 40 (39.2)     | 56 (54.9)       | 6 (5.9)                 | 102 (1.2)      |
| Total       | 4,015 (48.6)  | 4,110 (54.9)    | 97 (1.2)                | 8,222          |

<sup>^</sup>Includes all patients from pre-intervention, post-intervention 1, and post-intervention 2 time periods.

In the baseline time period, only 3.5% of patients had a complete set of vital signs documented (Table 3). In both post-intervention 1 and post-intervention 2 time periods, patients had higher odds of having a documented full set of vital signs (16% OR 5.4 (95% CI 4.3-6.7)). Adults were statistically more likely than children to have a documented full set of vitals (OR 1.43 (95% CI 1.26-1.62) (Table 4). Triage, implemented as part of the first education intervention, significantly influenced the likelihood of having a full set of vital signs recorded: patients who were triaged were 16 times more likely to have a full set of vitals compared to those in the same time periods who were not triaged (60% v 8.6%, OR 15.9 (95% CI 13.37-18.91)). There was no difference in vital signs obtained by gender.

All process outcomes measured showed significant quality improvements in the post-intervention groups compared to the baseline group, except the percent of patients with shock documented to receive IV fluids (Table 5). After the initial education session, patients had higher

odds of having a glucose documented for altered mental status or neurologic complaints (37% v 30%, OR 1.7 (95% CI 1.3-2.2)). Patients also had higher odds of having antibiotics documented for presumed bacterial infections (87% v 35%, OR 12.8 (95% CI 8.8-17.1)) and documented malaria diagnostic testing for fever (76% v 61%, OR 2.05 (1.37-3.08)) in the post-intervention 1 time periods. Additionally, patients presenting with shock were more likely to have a repeat set of vital signs documented (25% v 6.6%, OR 8.85 (1.67-14.06)). Although there was no statistically significant difference between pre-intervention and post-intervention 1 in patients presenting with hypoxia documented to receive oxygen, there was a statistical difference between post-intervention 2 and pre-intervention time periods (35.7% v 11.1%, OR 4.44 (1.15 to 17.25)). There were no significant differences between the post-intervention 1 and post-intervention 2 groups on any metrics. Metrics did not vary significantly by age group.

|                       | Pre-intervention<br>(n=2,732) | Post-intervention 1<br>(n=3,194) |                                                      | Post-intervention 2<br>(n=2,296) |                                                      | Odds ratio <sup>^</sup><br>(95%CI)<br>compared to post-intervention 1 |
|-----------------------|-------------------------------|----------------------------------|------------------------------------------------------|----------------------------------|------------------------------------------------------|-----------------------------------------------------------------------|
|                       | n (%)                         | n (%)                            | Odds ratio* (95% CI)<br>compared to pre-intervention | n (%)                            | Odds ratio* (95% CI)<br>compared to pre-intervention |                                                                       |
| Heart rate            | 925 (33.9)                    | 1,763 (55.2)                     | 2.41 (2.17 to 2.67)                                  | 1,183 (51.5)                     | 2.08 (1.85 to 2.33)                                  | 0.86 (0.77 to 0.96)                                                   |
| Respiratory rate      | 132 (4.8)                     | 647 (20.3)                       | 5.00 (4.12 to 6.08)                                  | 449 (19.6)                       | 4.79 (3.91 to 5.87)                                  | 0.96 (0.84 to 1.10)                                                   |
| Oxygen saturation     | 656 (24.0)                    | 1,511 (47.3)                     | 2.84 (2.54 to 3.18)                                  | 960 (41.8)                       | 2.27 (2.02 to 2.57)                                  | 0.80 (0.72 to 0.89)                                                   |
| Blood pressure        | 888 (32.5)                    | 1,580 (49.5)                     | 2.03 (1.83 to 2.26)                                  | 942 (41.0)                       | 1.44 (1.29 to 1.62)                                  | 0.71 (0.64 to 0.79)                                                   |
| Temperature           | 1,721 (63.0)                  | 2,201 (68.9)                     | 1.30 (1.17 to 1.45)                                  | 1,752 (76.3)                     | 1.89 (1.67 to 2.14)                                  | 1.45 (1.28 to 1.64)                                                   |
| AVPU**                | 0                             | 458 (14.3)                       | n/a                                                  | 274 (11.9)                       | n/a                                                  | 0.81 (0.69 to 0.95)                                                   |
| Weight                | 190 (7.0)                     | 715 (22.4)                       | 3.86 (3.26 to 4.57)                                  | 456 (19.9)                       | 3.32 (2.77 to 3.97)                                  | 0.86 (0.75 to 0.98)                                                   |
| Full set of vitals*** | 95 (3.5)                      | 516 (16.2)                       | 5.35 (4.27 to 6.70)                                  | 372 (16.2)                       | 5.37 (4.25 to 6.77)                                  | 1.01 (0.87 to 1.16)                                                   |

\*Odds ratios calculated with pre-intervention group as baseline odds.  
<sup>^</sup>Odds ratios calculated for post-intervention 2 group with post-intervention 1 group as baseline odds.  
\*\* AVPU assesses level of consciousness as either Alert, responds to Verbal stimuli, responds to Pain, Unresponsive. It is a system to assess the level of consciousness in a patient.  
\*\*\*A full set of vitals for patients age 5 and over includes heart rate, respiratory rate, oxygen saturation, blood pressure and temperature. A full set of vitals for patients under age 5 includes heart rate, respiratory rate, oxygen saturation and temperature

Table 4 Documented vital signs measurement by age-group after initial intervention<sup>&</sup>

|                                   | Age 0 - <5<br>(n=1,401) | Age 5 - <18<br>(n=1,214) |                                                         | Age 18+<br>(n=2,801) |                                                        |                                                                   |
|-----------------------------------|-------------------------|--------------------------|---------------------------------------------------------|----------------------|--------------------------------------------------------|-------------------------------------------------------------------|
|                                   | n (%)                   | n (%)                    | Odds ratio* (95%<br>CI) compared to<br>age-group 0 - <5 | n (%)                | Odds ratio*(95% CI)<br>compared to age-group<br>0 - <5 | Odds ratio^ (95% CI)<br>compared to combined<br>age-group 0 - <18 |
| Heart rate                        | 517 (36.9)              | 526 (43.3)               | 1.31 (1.12 to 1.53)                                     | 1,849 (66)           | 3.32 (2.91 to 3.8)                                     | 2.93 (2.62 to 3.27)                                               |
| Respiratory rate                  | 245 (17.5)              | 211 (17.4)               | 0.99 (0.81 to 1.22)                                     | 621 (22.2)           | 1.34 (1.14 to 1.58)                                    | 1.35 (1.18 to 1.54)                                               |
| Oxygen saturation                 | 466 (33.3)              | 432 (35.6)               | 1.11 (0.94 to 1.30)                                     | 1,527 (54.5)         | 2.4 (2.1 to 2.75)                                      | 2.29 (2.05 to 2.56)                                               |
| Blood pressure                    | 167 (11.9)              | 399 (32.9)               | 3.62 (3 to 4.42)                                        | 1,904 (68)           | 15.68 (13.1 to 18.78)                                  | 7.68 (6.8 to 8.68) <sup>%</sup>                                   |
| Temperature                       | 1,107 (79)              | 898 (74)                 | 0.75 (0.63 to 0.90)                                     | 1,898 (67.8)         | 0.56 (0.48 to 0.65)                                    | 0.64 (0.57 to 0.72)                                               |
| AVPU <sup>**</sup>                | 149 (10.6)              | 142 (11.7)               | 1.11 (0.87 to 1.42)                                     | 418 (14.9)           | 1.47 (1.21 to 1.8)                                     | 1.4 (1.19 to 1.64)                                                |
| Weight                            | 528 (37.7)              | 304 (25)                 | 0.55 (0.47 to 0.65)                                     | 324 (11.6)           | 0.22 (0.18 to 0.25)                                    | 0.28 (0.24 to 0.32)                                               |
| Full set of vitals <sup>***</sup> | 216 (15.4)              | 134 (11)                 | 0.58 (0.54 to 0.86)                                     | 520 (18.6)           | 1.25 (1.05 to 1.49)                                    | 1.48 (1.27 to 1.71)                                               |

<sup>\*</sup>This includes all patients after post-intervention 1 and post-intervention 2, (excluding those in the pre-intervention, intermediate time period and those patients missing an age)

<sup>\*</sup>Odds ratios calculated with age-group 0-5 as baseline odds.

<sup>^</sup>Odds ratios calculated for combined age-group 18+ with combined age groups 0 - <5 and 5 - <18 as baseline odds.

<sup>%</sup>Note that blood pressure may be less reliably measured...

<sup>\*\*</sup> AVPU- Alert, Verbal, Pain, Unresponsive. It is a system to assess the level of consciousness in a patient.

<sup>\*\*\*</sup>A full set of vitals for patients age 5 and over includes heart rate, respiratory rate, oxygen saturation, blood pressure and temperature. A full set of vitals for patients under age 5 includes heart rate, respiratory rate, oxygen saturation and temperature.

Table 5. Documented process outcomes by intervention period

|                                                                                                                                                                                                                                                                                | Pre-intervention  | Post-intervention 1 |                                                   | Post-intervention 2 |                                                   |                                                     |
|--------------------------------------------------------------------------------------------------------------------------------------------------------------------------------------------------------------------------------------------------------------------------------|-------------------|---------------------|---------------------------------------------------|---------------------|---------------------------------------------------|-----------------------------------------------------|
|                                                                                                                                                                                                                                                                                | n of total (%)    | n of total (%)      | Odds ratio* (95% CI) compared to pre-intervention | n of total (%)      | Odds ratio* (95% CI) compared to pre-intervention | Odds ratio^ (95%CI) compared to post-intervention 1 |
| Glucose test documented, among those with a neurologic chief complaint                                                                                                                                                                                                         | 145 of 560 (25.9) | 254 of 672 (37.1)   | 1.74 (1.36 to 2.22)                               | 169 of 469 (35.2)   | 1.61 (1.23 to 2.11)                               | 0.93 (0.73 to 1.18)                                 |
| <b>Antibiotics documented, among those with a final diagnosis of presumed bacterial infection</b>                                                                                                                                                                              | 154 of 441 (34.8) | 415 of 478 (86.5)   | 12.28 (8.83 to 17.07)                             | 335 of 388 (85.7)   | 11.78 (8.30 to 16.71)                             | 0.96 (0.65 to 1.42)                                 |
| Malaria test recorded, among those with a documented fever                                                                                                                                                                                                                     | 139 of 229 (60.7) | 168 of 221 (76.0)   | 2.05 (1.37 to 3.08)                               | 179 of 242 (74.0)   | 1.84 (1.24 to 2.72)                               | 0.91 (0.59 to 1.38)                                 |
| <b>Oxygen delivery recorded, among those with documented hypoxia</b>                                                                                                                                                                                                           | 3 of 27 (11.1)    | 20 of 71 (28.2)     | 3.14 (0.85 to 11.59)                              | 15 of 42 (35.7)     | 4.44 (1.15 to 17.25)                              | 1.42 (0.63 to 3.20)                                 |
| Repeat set of vital signs recorded, among those with initial shock vital signs**                                                                                                                                                                                               | 4 of 61 (6.6)     | 49 of 193 (25.4)    | 8.85 (1.67 to 14.06)                              | 34 of 135 (25.2)    | 4.80 (1.62 to 14.21)                              | 0.99 (0.60 to 1.64)                                 |
| <b>IVF documented, among those with initial shock vital signs**</b>                                                                                                                                                                                                            | 16 of 45 (35.6)   | 41 of 192 (21.4)    | 0.76 (0.39 to 1.49)                               | 23 of 135 (17.0)    | 0.58 (0.28 to 1.19)                               | 0.76 (0.43 to 1.33)                                 |
| *Odds ratios calculated with pre-intervention group as baseline odds<br>^Odds ratios calculated for post-intervention 2 group with post-intervention 1 group as baseline odds.<br>** Shock identified by appropriate vital signs according to age.<br>IVF = Intravenous fluids |                   |                     |                                                   |                     |                                                   |                                                     |

## DISCUSSION

The study evaluated key quality process metrics before and after emergency care education sessions at a rural Liberian hospital. Almost all metrics improved after the education sessions compared to baseline, though additional gains were not seen with a second clinical training.

Notably, patients who were triaged in the post-intervention time periods showed significant gains

1  
2  
3 in having full sets of vital signs documented compared to patients in the same time period who  
4 were not triaged. Our study supports clinical trainings and triage training and implementation as  
5 an important step in improving care quality.  
6  
7  
8  
9

10  
11  
12 Pre-intervention, few patients had full sets of vital signs documented. Vital signs are an essential  
13 part of a patient's clinical evaluation, can detect serious illness, and help monitor for clinical  
14 deterioration.<sup>27,29</sup> Post-interventions, the odds of having a full set of vitals increased five-fold.  
15  
16  
17 Notably, patients who were triaged were nearly 16 times as likely to have a full set of vitals than  
18 those who were not, even in the same time period, suggesting that small interventions can be  
19 associated with improved emergency care.  
20  
21  
22  
23  
24  
25  
26  
27

28  
29 Despite these gains, few patients overall had a full set of vitals documented post-interventions  
30 (16.2%). There are several likely contributing factors to this. First, due to the limited human  
31 resources, triage was inconsistently implemented. Without triage, vitals were performed by the  
32 providers themselves as they evaluated patients. Due to the volume of patients, boarding patients  
33 within the ED, and human resource constraints, anecdotal reports suggest providers often only  
34 obtained partial or forwent vitals due to time pressure. In addition, providers were observed to  
35 not consistently record vitals they obtained, particularly when the ED was very busy.  
36  
37  
38  
39  
40  
41  
42  
43

44  
45 Additionally, equipment constraints likely impacted efficiency, as VS machines are limited, and  
46 with intermittent electricity, automated machines were not always functional. Similarly, limited  
47 availability of specific age-appropriate vital sign equipment may have led to variability amongst  
48 age groups.  
49  
50  
51  
52  
53  
54  
55  
56  
57  
58  
59  
60

1  
2  
3 Large gains were seen in documented antibiotic administration among patients with presumed  
4 bacterial infections and in patients with shock receiving repeat vital signs. Patients presenting to  
5 the ED with a presumed bacterial infection were over 12 times more likely to have antibiotics  
6 documented after the initial emergency care education session, and patients presenting to the ED  
7 in shock were nearly nine times more likely to have repeat vital signs documented. These  
8 significant gains have the potential to reduce morbidity and mortality from sepsis, a significant  
9 contribution to the burden of disease in LMICs.<sup>30,31</sup> These findings suggest that limited  
10 emergency care education sessions are associated with improved quality of emergency care  
11 provided by front-line providers and nurses. Future randomized studies should be considered to  
12 quantify the impact.  
13  
14  
15  
16  
17  
18  
19  
20  
21  
22  
23  
24  
25  
26  
27

28 The similarity of outcomes in the post-intervention 1 and post-intervention 2 time periods may  
29 also be impacted by limitations of human resources and equipment. Staff turnover in the ED is  
30 relatively high. Attrition meant that 31% of the participants in intervention 2 were receiving  
31 initial training rather than re-training, possibly limiting impact. Also, the presence of ED-trained  
32 supervisors was intermittent, limiting the exposure of the staff to daily supervision and  
33 mentorship to help fortify the training. In addition, several of the process metrics depended on  
34 the availability of supplies or equipment. Our findings likely reflect a need for comprehensive  
35 health system strengthening, of which education sessions are only one component. Increases in  
36 overall health financing are also needed to expand the availability of staff and materials to  
37 improve patient care. Additionally, further evaluation is needed to identify the best ways for  
38 ongoing continuing medical education and staff support. Aside from these explanations, the  
39 similarity of outcomes in post-intervention 1 and post-intervention 2 time periods could reflect  
40  
41  
42  
43  
44  
45  
46  
47  
48  
49  
50  
51  
52  
53  
54  
55  
56  
57  
58  
59  
60

1  
2  
3 that the additional education session was necessary to ensure continued higher quality care and to  
4  
5 keep metrics stable. If the second educational intervention did not take place, it is possible the  
6  
7 outcomes could have been worse, especially without daily supervision or mentorship.  
8  
9

## 10 11 12 **LIMITATIONS** 13

14 This study's results must be considered within the context of its design. One notable limitation is  
15  
16 that our method of measuring process metrics was documentation by the ED care provider and  
17  
18 not direct observation of whether the care was provided. Particularly in an understaffed  
19  
20 environment with many competing clinical demands and without administrative processes to  
21  
22 hold providers accountable for their documentation, documentation may lag behind actual  
23  
24 performance of tasks. There is also the risk of bias where providers document inaccurately,  
25  
26 however, we suspect that under-reporting was likely the larger contributor. In the local care  
27  
28 context, care processes such as placing oxygen on the patient or giving IV fluids do not require  
29  
30 an order and thus might not be documented in the patient chart.  
31  
32  
33  
34  
35  
36  
37

38 Given data systems at the hospital, we relied on retrospective data entry from paper records. It is  
39  
40 possible additional interventions or vital sign measurements were performed but not  
41  
42 documented. There may be unknown missing patient data, due to mixed methods of chart  
43  
44 documentation. There was potential for missing data in the month of June, which had less data  
45  
46 points when compared to the remaining months. Second, although this study suggests the  
47  
48 interventions are associated with increases in quality metrics, causality cannot be established. In  
49  
50 addition, we cannot rule out confounding between metrics and/or unmeasured variables, for  
51  
52 example if increased rates of full sets of vital signs measured contributed to a higher likelihood  
53  
54  
55  
56  
57  
58  
59  
60

1  
2  
3 of receiving repeat vitals. Future studies should address this. Third, the study looked at  
4 interventions as binary variables, but did not assess if the details of the intervention were  
5 appropriate to an individual patient. Finally, this study was conducted at a single site in rural  
6 Liberia that had not received any prior emergency care training and the generalizability of our  
7 findings is unknown.  
8  
9  
10  
11  
12  
13

## 14 15 16 17 **CONCLUSION**

18  
19 This study demonstrated an improvement in most process metrics after the implementation of  
20 triage and emergency care training in rural Liberia, supporting the utility of short-course  
21 interventions on facility-based care. This complements other evaluations of BEC trainings,  
22 which demonstrated increased emergency care knowledge and confidence.<sup>20,21</sup> However,  
23 additional gains were not seen with a re-training several months later. Further exploration is  
24 needed to determine and intervene on other factors that influence quality metrics as well as the  
25 best methods for ongoing continue medical education and staff support.  
26  
27  
28  
29  
30  
31  
32  
33  
34  
35  
36  
37

## 38 **FOOTNOTES**

### 39 40 **Data Availability Statement**

41  
42 All data relevant to the study are included in the article or uploaded as supplementary  
43 information.  
44  
45

### 46 47 **Patient consent for publication**

48  
49 The IRB approved a Waiver of informed consent given the study was a chart review study, so  
50 informed consent was not obtained.  
51  
52  
53  
54  
55  
56  
57  
58  
59  
60



## Ethics Approval

The study was approved by the Partners Healthcare IRB 2019P001944 as well as approved under the University of Liberia-Pacific Institute for Research and Evaluation IRB 17-06-048 as part of the clinical and training protocol that Partners In Health Liberia submits annually for review.

**Contributors:** KT, ID, AP, VK, RHM, PU, RC, SAR contributed to study design. KT, ID, AP, NL, VK, RHM, MH, AB, RC, SAR implemented the emergency care trainings. KT, ID, DD, TD, SM contributed to data collection. KT, ID, JG, PS, SAR contributed to data analysis. All authors contributed to interpretation of study results. KT and ID drafted the initial version of the manuscript. All authors contributed to the revision of the manuscript and have approved the final manuscript version. KT and ID were equal contributors. KT is responsible for this paper and content as a guarantor.

**Funding:** This work was funded by the Ansara Family Foundation; funders did not have any role in study design or the analysis or publication of results.

**Competing Interests:** None declared.

**Figure 1 Education Intervention Timeline 2019:** Figure 1 shows the timeline of the study including education session time periods, the time periods pre and post-interventions, as well as time periods where mentorship was provided.

**REFERENCES**

1. Jamison DT, Gelband H, Horton S, et al. Disease Control Priorities: Improving Health and Reducing Poverty [Internet]. Vol 9. 3<sup>rd</sup> ed. The World Bank; 2017[cited 2020 Nov 5]. Available from: <http://elibrary.worldbank.org/doi/book/10.1596/978-1-4648-0527-1>
2. Anderson PD, Suter RE, Mulligan T, et al. World health assembly resolution 60.22 and its importance as a health care policy tool for improving emergency care access and availability globally. *Ann Emerg Med.* 2012;60(1):35-44. DOI: 10.1016/j.annemergmed.2011.10.018. DOI: 10.1016/j.annemergmed.2011.10.018
3. Emergency care systems for universal health coverage: ensuring timely care for the acutely ill and injured. Seventy-Second World Health Assembly. May 28, 2019 [cited 2020 Nov 5]. Available from: <https://www.who.int/publications/i/item/emergency-care-systems-for-universal-health-coverage-ensuring-timely-care-for-the-acutely-ill-and-injured>
4. Razzak JA, Kellermann AL. Emergency medical care in developing countries: is it worthwhile?. *Bull World Health Organ.* 2002;80(11):900-905. Available from: <https://doi.org/https://www.ncbi.nlm.nih.gov/pmc/articles/PMC2567674/>
5. Anderson P. The globalization of emergency medicine and its importance for public health. *Bull World Health Organ.* 2006;84(10):835-838. DOI: 10.2471/blt.05.028548
6. Risko N, Chandra A, Burkholder TW, et al. Advancing research on the economic value of emergency care. *BMJ Glob Health.* 2019;4(6). DOI:10.1136/bmjgh-2019-001768
7. Thind A, Hsia R, Mabweijano J, et al. Essential Surgery: Disease Control Priorities. Vol 1. 3<sup>rd</sup> ed. The International Bank for Reconstruction and Development / The World Bank;

- 1  
2  
3 2015. [cited 2020 Nov 9]. Available from:  
4  
5 <http://www.ncbi.nlm.nih.gov/books/NBK333513/>  
6  
7  
8  
9 8. Gosselin R, Spiegel DA, Coughlin R, et al. Injuries: the neglected burden in developing  
10 countries. *Bull World Health Organ*. 2009;87(4):246-246. DOI: 10.2471/BLT.08.052290  
11  
12  
13  
14 9. Calvello EJB, Broccoli M, Risko N, et al. Emergency care and health systems: consensus-  
15 based recommendations and future research priorities. *Acad Emerg Med*.  
16  
17 2013;20(12):1278-1288. DOI: 10.1111/acem.12266  
18  
19  
20  
21  
22 10. Razzak J, Usmani MF, Bhutta ZA. Global, regional and national burden of emergency  
23 medical diseases using specific emergency disease indicators: analysis of the 2015 global  
24 burden of disease study. *BMJ Glob Health*. 2019;4(2). DOI:10.1136/bmjgh-2018-000733  
25  
26  
27  
28  
29  
30 11. *Basic Package for Health and Social Welfare Services for Liberia*. Ministry of Health and  
31 Social Welfare Republic of Liberia. June 2008;42. [cited 2020 Nov 5]. Available from:  
32 [http://liberiamohsw.org/Policies%20&%20Plans/Basic%20Package%20for%20Health%20](http://liberiamohsw.org/Policies%20&%20Plans/Basic%20Package%20for%20Health%20&%20Social%20Welfare%20for%20Liberia.pdf)  
33 [&%20Social%20Welfare%20for%20Liberia.pdf](http://liberiamohsw.org/Policies%20&%20Plans/Basic%20Package%20for%20Health%20&%20Social%20Welfare%20for%20Liberia.pdf)  
34  
35  
36  
37  
38  
39  
40 12. Kruk ME, Rockers PC, Williams EH, et al. Availability of essential health services in post-  
41 conflict Liberia. *Bull World Health Organ*. 2010;88(7):527-534. DOI:  
42 10.2471/BLT.09.071068  
43  
44  
45  
46  
47  
48 13. Hexom B, Calvello EJB, Babcock CA, et al. A model for emergency medicine education in  
49 post-conflict Liberia. *Afr J Emerg Med*. 2012;2(4):143-150.  
50  
51  
52  
53  
54  
55  
56  
57  
58  
59  
60

- 1  
2  
3 14. McQuilkin PA, Udhayashankar K, Niescierenko M, et al. Health-care access during the  
4 Ebola virus epidemic in Liberia. *Am J Trop Med Hyg.* 2017;97(3):931-936. DOI:  
5  
6 10.4269/ajtmh.16-0702  
7  
8  
9  
10  
11 15. Downie R. The Road to Recovery: Rebuilding Liberia's Health System. Center for Strategic  
12 and International Studies: August 2012;24. [cited 2020 Nov 5]. Available from: [https://csis-](https://csis-website-prod.s3.amazonaws.com/s3fs-public/legacy_files/files/publication/120822_Downie_RoadtoRecovery_web.pdf)  
13 [website-prod.s3.amazonaws.com/s3fs-](https://csis-website-prod.s3.amazonaws.com/s3fs-public/legacy_files/files/publication/120822_Downie_RoadtoRecovery_web.pdf)  
14 [public/legacy\\_files/files/publication/120822\\_Downie\\_RoadtoRecovery\\_web.pdf](https://csis-website-prod.s3.amazonaws.com/s3fs-public/legacy_files/files/publication/120822_Downie_RoadtoRecovery_web.pdf)  
15  
16  
17  
18  
19  
20  
21 16. 2008 National Population and Housing Census: preliminary results. Government of the  
22 Republic of Liberia. June 2008;23. [cited 2020 Nov 5]. Available from:  
23 [https://www.emansion.gov.lr/doc/census\\_2008provisionalresults.pdf](https://www.emansion.gov.lr/doc/census_2008provisionalresults.pdf)  
24  
25  
26  
27  
28  
29 17. Mitchell R, McKup JJ, Bue O, et al. Implementation of a novel three-tier triage tool in Papua  
30 New Guinea: a model for resource-limited emergency departments. *Lancet Reg Health -*  
31 *West Pac.* 2020;5:100051. DOI: 10.1016/j.lanwpc.2020.100051  
32  
33  
34  
35  
36  
37 18. Mitchell R, Bue O, Nou G, et al. Validation of the interagency triage tool in a resource  
38 limited, urban emergency department in Papua New Guinea: a pilot study. *Lancet Reg*  
39 *Health-West Pac.* 2021;13:100194. DOI: <https://doi.org/10.1016/j.lanwpc.2021.100194>  
40  
41  
42  
43  
44  
45 19. World Health Organization. Clinical care for severe acute respiratory infection: toolkit.  
46 COVID-19 adaptation [Internet]. Geneva: World Health Organization; 2020 [cited 2020  
47 Dec 27]. 13-15p. Available from: <https://apps.who.int/iris/handle/10665/331736>  
48  
49  
50  
51  
52  
53  
54  
55  
56  
57  
58  
59  
60

- 1  
2  
3  
4  
5  
6  
7  
8  
9  
10  
11  
12  
13  
14  
15  
16  
17  
18  
19  
20  
21  
22  
23  
24  
25  
26  
27  
28  
29  
30  
31  
32  
33  
34  
35  
36  
37  
38  
39  
40  
41  
42  
43  
44  
45  
46  
47  
48  
49  
50  
51  
52  
53  
54  
55  
56  
57  
58  
59  
60
20. Olufadeji A, Usoro A, Akubueze CE, et al. Results from the implementation of the World Health Organization basic emergency care course in Lagos, Nigeria. *Afr J Emerg Med.* 2021;11(2):231-236. DOI: 10.1016/j.afjem.2021.02.004
  21. Kivlehan SM, Dixon J, Kalanzi J, et al. Strengthening emergency care knowledge and skills in Uganda and Tanzania with the WHO-ICRC basic emergency care course. *Emerg Med J.* 2021;38(8):636-642. DOI: 10.1136/emered-2020-209718
  22. WHO Standardized Clinical Form. World Health Organization. January 14, 2020 [cited 2022 April 1] Available from: <https://www.who.int/publications/i/item/who-standardized-clinical-form>
  23. Broccoli MC, Moresky R, Dixon J, et al. Defining quality indicators for emergency care delivery: findings of an expert consensus process by emergency care practitioners in Africa. *BMJ Glob Health.* 2018;3(1):e000479. DOI: 10.1136/bmjgh-2017-000479
  24. Aaronson EL, Marsh RH, Guha M, et al. Emergency department quality and safety indicators in resource-limited settings: an environmental survey. *Int J Emerg Med.* 2015;8(1):39. DOI 10.1186/s12245-015-0088-x
  25. World Health Organization. Quality of care [Internet]. Geneva: World Health Organization;2022 [cited 2022 Dec 27]. Available from: [https://www.who.int/health-topics/quality-of-care#tab=tab\\_1](https://www.who.int/health-topics/quality-of-care#tab=tab_1)
  26. Cooper RJ, Schriger DL, Flaherty HL, et al. Effect of vital signs on triage decisions. *Ann Emerg Med.* 2002;39(3):223-232. DOI: 10.1067/mem.2002.121524

- 1  
2  
3 27. DeVita MA, Hillman K, Bellomo R, et al. Textbook of Rapid Response Systems: Concept  
4 and Implementation. Springer International Publishing; 2017. [cited 2020 Nov 5]. Available  
5 from: <http://link.springer.com/10.1007/978-3-319-39391-9>  
6  
7  
8  
9  
10  
11 28. *StataCorp. 2017. Stata Statistical Software: Release 15. College Station, TX: StataCorp*  
12 *LLC.*  
13  
14  
15  
16  
17 29. Brekke IJ, Puntervoll LH, Pedersen PB, et al. The value of vital sign trends in predicting and  
18 monitoring clinical deterioration: A systematic review. *PLoS ONE*. 2019;14(1). DOI:  
19 10.1371/journal.pone.0210875  
20  
21  
22  
23  
24 30. Vos T, Lim SS, Abbafati C, et al. Global burden of 369 diseases and injuries in 204 countries  
25 and territories, 1990–2019: a systematic analysis for the global burden of disease study  
26 2019. *The Lancet*. 2020;396(10258):1204-1222. DOI: 10.1016/S0140-6736(20)30925-9  
27  
28  
29  
30  
31  
32 31. Stephen AH, Montoya RL, Aluisio AR. Sepsis and Septic Shock in Low- and Middle-  
33 Income Countries. *Surg Infect*. 2020;21(7):571-578. DOI: 10.1089/sur.2020.047  
34  
35  
36  
37  
38  
39  
40  
41  
42  
43  
44  
45  
46  
47  
48  
49  
50  
51  
52  
53  
54  
55  
56  
57  
58  
59  
60

1  
2  
3  
4  
5  
6  
7  
8  
9  
10  
11  
12  
13  
14  
15  
16  
17  
18  
19  
20  
21  
22  
23  
24  
25  
26  
27  
28  
29  
30  
31  
32  
33  
34  
35  
36  
37  
38  
39  
40  
41  
42  
43  
44  
45  
46  
47  
48  
49  
50  
51  
52  
53  
54  
55  
56  
57  
58  
59  
60

Figure 1. Education Intervention Timeline 2019

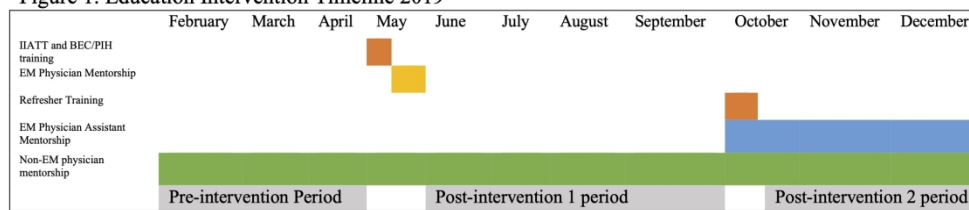

Figure 1 shows the timeline of the study including education session time periods, the time periods pre and post-interventions, as well as time periods where mentorship was provided.

795x192mm (72 x 72 DPI)

STROBE Statement—Checklist of items that should be included in reports of *cross-sectional studies*

|                              | Item No | Recommendation                                                                                                                                                                                    | Page No |
|------------------------------|---------|---------------------------------------------------------------------------------------------------------------------------------------------------------------------------------------------------|---------|
| <b>Title and abstract</b>    | 1       | (a) Indicate the study's design with a commonly used term in the title or the abstract                                                                                                            | 1       |
|                              |         | (b) Provide in the abstract an informative and balanced summary of what was done and what was found                                                                                               | 1-2     |
| <b>Introduction</b>          |         |                                                                                                                                                                                                   |         |
| Background/rationale         | 2       | Explain the scientific background and rationale for the investigation being reported                                                                                                              | 3-4     |
| Objectives                   | 3       | State specific objectives, including any prespecified hypotheses                                                                                                                                  | 4       |
| <b>Methods</b>               |         |                                                                                                                                                                                                   |         |
| Study design                 | 4       | Present key elements of study design early in the paper                                                                                                                                           | 4       |
| Setting                      | 5       | Describe the setting, locations, and relevant dates, including periods of recruitment, exposure, follow-up, and data collection                                                                   | 4-6     |
| Participants                 | 6       | (a) Give the eligibility criteria, and the sources and methods of selection of participants                                                                                                       | 6-7     |
| Variables                    | 7       | Clearly define all outcomes, exposures, predictors, potential confounders, and effect modifiers. Give diagnostic criteria, if applicable                                                          | 7-8     |
| Data sources/<br>measurement | 8*      | For each variable of interest, give sources of data and details of methods of assessment (measurement). Describe comparability of assessment methods if there is more than one group              | 7-8     |
| Bias                         | 9       | Describe any efforts to address potential sources of bias                                                                                                                                         | 16      |
| Study size                   | 10      | Explain how the study size was arrived at                                                                                                                                                         | 6,9     |
| Quantitative variables       | 11      | Explain how quantitative variables were handled in the analyses. If applicable, describe which groupings were chosen and why                                                                      | 7-8     |
| Statistical methods          | 12      | (a) Describe all statistical methods, including those used to control for confounding                                                                                                             | 9       |
|                              |         | (b) Describe any methods used to examine subgroups and interactions                                                                                                                               | 9       |
|                              |         | (c) Explain how missing data were addressed                                                                                                                                                       | 7       |
|                              |         | (d) If applicable, describe analytical methods taking account of sampling strategy                                                                                                                | N/A     |
|                              |         | (e) Describe any sensitivity analyses                                                                                                                                                             | N/A     |
| <b>Results</b>               |         |                                                                                                                                                                                                   |         |
| Participants                 | 13*     | (a) Report numbers of individuals at each stage of study—eg numbers potentially eligible, examined for eligibility, confirmed eligible, included in the study, completing follow-up, and analysed | 9-11    |
|                              |         | (b) Give reasons for non-participation at each stage                                                                                                                                              | 9       |
|                              |         | (c) Consider use of a flow diagram                                                                                                                                                                |         |
| Descriptive data             | 14*     | (a) Give characteristics of study participants (eg demographic, clinical, social) and information on exposures and potential confounders                                                          | 9-10    |
|                              |         | (b) Indicate number of participants with missing data for each variable of interest                                                                                                               | 9       |
| Outcome data                 | 15*     | Report numbers of outcome events or summary measures                                                                                                                                              | 10-11   |



|    |                          |    |                                                                                                                                                                                                              |
|----|--------------------------|----|--------------------------------------------------------------------------------------------------------------------------------------------------------------------------------------------------------------|
| 1  |                          |    |                                                                                                                                                                                                              |
| 2  | Main results             | 16 | (a) Give unadjusted estimates and, if applicable, confounder-adjusted estimates and their precision (eg, 95% confidence interval). Make clear which confounders were adjusted for and why they were included |
| 3  |                          |    | 10-11                                                                                                                                                                                                        |
| 4  |                          |    |                                                                                                                                                                                                              |
| 5  |                          |    |                                                                                                                                                                                                              |
| 6  |                          |    | (b) Report category boundaries when continuous variables were categorized                                                                                                                                    |
| 7  |                          |    | 10-11                                                                                                                                                                                                        |
| 8  |                          |    |                                                                                                                                                                                                              |
| 9  |                          |    | (c) If relevant, consider translating estimates of relative risk into absolute risk for a meaningful time period                                                                                             |
| 10 |                          |    | N/A                                                                                                                                                                                                          |
| 11 | Other analyses           | 17 | Report other analyses done—eg analyses of subgroups and interactions, and sensitivity analyses                                                                                                               |
| 12 |                          |    | 10                                                                                                                                                                                                           |
| 13 |                          |    |                                                                                                                                                                                                              |
| 14 | <b>Discussion</b>        |    |                                                                                                                                                                                                              |
| 15 | Key results              | 18 | Summarise key results with reference to study objectives                                                                                                                                                     |
| 16 |                          |    | 13-16                                                                                                                                                                                                        |
| 17 |                          |    |                                                                                                                                                                                                              |
| 18 | Limitations              | 19 | Discuss limitations of the study, taking into account sources of potential bias or imprecision. Discuss both direction and magnitude of any potential bias                                                   |
| 19 |                          |    | 16-17                                                                                                                                                                                                        |
| 20 |                          |    |                                                                                                                                                                                                              |
| 21 | Interpretation           | 20 | Give a cautious overall interpretation of results considering objectives, limitations, multiplicity of analyses, results from similar studies, and other relevant evidence                                   |
| 22 |                          |    | 16-17                                                                                                                                                                                                        |
| 23 |                          |    |                                                                                                                                                                                                              |
| 24 | Generalisability         | 21 | Discuss the generalisability (external validity) of the study results                                                                                                                                        |
| 25 |                          |    | 17                                                                                                                                                                                                           |
| 26 |                          |    |                                                                                                                                                                                                              |
| 27 | <b>Other information</b> |    |                                                                                                                                                                                                              |
| 28 | Funding                  | 22 | Give the source of funding and the role of the funders for the present study and, if applicable, for the original study on which the present article is based                                                |
| 29 |                          |    | 24                                                                                                                                                                                                           |
| 30 |                          |    |                                                                                                                                                                                                              |
| 31 |                          |    |                                                                                                                                                                                                              |
| 32 |                          |    |                                                                                                                                                                                                              |

\*Give information separately for exposed and unexposed groups.

**Note:** An Explanation and Elaboration article discusses each checklist item and gives methodological background and published examples of transparent reporting. The STROBE checklist is best used in conjunction with this article (freely available on the Web sites of PLoS Medicine at <http://www.plosmedicine.org/>, Annals of Internal Medicine at <http://www.annals.org/>, and Epidemiology at <http://www.epidem.com/>). Information on the STROBE Initiative is available at [www.strobe-statement.org](http://www.strobe-statement.org).

# BMJ Open

## Evaluation of Emergency Care Education and Triage Implementation: an observational study at a hospital in rural Liberia

|                                 |                                                                                                                                                                                                                                                                                                                                                                                                                                                                                                                                                                                                                                                                                                                                                                                                                                                                                                                                                                                           |
|---------------------------------|-------------------------------------------------------------------------------------------------------------------------------------------------------------------------------------------------------------------------------------------------------------------------------------------------------------------------------------------------------------------------------------------------------------------------------------------------------------------------------------------------------------------------------------------------------------------------------------------------------------------------------------------------------------------------------------------------------------------------------------------------------------------------------------------------------------------------------------------------------------------------------------------------------------------------------------------------------------------------------------------|
| Journal:                        | <i>BMJ Open</i>                                                                                                                                                                                                                                                                                                                                                                                                                                                                                                                                                                                                                                                                                                                                                                                                                                                                                                                                                                           |
| Manuscript ID                   | bmjopen-2022-067343.R2                                                                                                                                                                                                                                                                                                                                                                                                                                                                                                                                                                                                                                                                                                                                                                                                                                                                                                                                                                    |
| Article Type:                   | Original research                                                                                                                                                                                                                                                                                                                                                                                                                                                                                                                                                                                                                                                                                                                                                                                                                                                                                                                                                                         |
| Date Submitted by the Author:   | 08-Mar-2023                                                                                                                                                                                                                                                                                                                                                                                                                                                                                                                                                                                                                                                                                                                                                                                                                                                                                                                                                                               |
| Complete List of Authors:       | Towns, Kathleen; University of Michigan Michigan Medicine, Internal Medicine; Partners In Health<br>Dolo, Isaac; Partners In Health Liberia<br>Pickering, Ashley; University of Colorado - Anschutz Medical Campus, CO, USA<br>Ludmer, Nicholas; University of Illinois Chicago Department of Emergency Medicine; Partners In Health<br>Karanja, Viola; Partners In Health Liberia<br>Marsh, Regan H ; Harvard Medical School; Partners In Health<br>Horace, Minnie; McGill University<br>Dweh, Denny; Partners In Health Liberia<br>Dalieh, Tresa; Partners In Health Liberia<br>Myers, Sharon; Partners In Health Liberia<br>Bukhman, Alice; Harvard Medical School; Partners In Health<br>Gashi, Jason; Boston University<br>Sonenthal, Paul; Harvard Medical School; Partners In Health<br>Ulysse, Patrick; Partners In Health; Partners In Health Liberia<br>Cook, Rebecca; Harvard Medical School; Partners In Health<br>Rouhani, Shada; Harvard Medical School; Partners In Health |
| <b>Primary Subject Heading</b>: | Emergency medicine                                                                                                                                                                                                                                                                                                                                                                                                                                                                                                                                                                                                                                                                                                                                                                                                                                                                                                                                                                        |
| Secondary Subject Heading:      | Emergency medicine, Global health                                                                                                                                                                                                                                                                                                                                                                                                                                                                                                                                                                                                                                                                                                                                                                                                                                                                                                                                                         |
| Keywords:                       | ACCIDENT & EMERGENCY MEDICINE, EDUCATION & TRAINING (see Medical Education & Training), MEDICAL EDUCATION & TRAINING                                                                                                                                                                                                                                                                                                                                                                                                                                                                                                                                                                                                                                                                                                                                                                                                                                                                      |
|                                 |                                                                                                                                                                                                                                                                                                                                                                                                                                                                                                                                                                                                                                                                                                                                                                                                                                                                                                                                                                                           |

SCHOLARONE™  
Manuscripts



I, the Submitting Author has the right to grant and does grant on behalf of all authors of the Work (as defined in the below author licence), an exclusive licence and/or a non-exclusive licence for contributions from authors who are: i) UK Crown employees; ii) where BMJ has agreed a CC-BY licence shall apply, and/or iii) in accordance with the terms applicable for US Federal Government officers or employees acting as part of their official duties; on a worldwide, perpetual, irrevocable, royalty-free basis to BMJ Publishing Group Ltd ("BMJ") its licensees and where the relevant Journal is co-owned by BMJ to the co-owners of the Journal, to publish the Work in this journal and any other BMJ products and to exploit all rights, as set out in our [licence](#).

The Submitting Author accepts and understands that any supply made under these terms is made by BMJ to the Submitting Author unless you are acting as an employee on behalf of your employer or a postgraduate student of an affiliated institution which is paying any applicable article publishing charge ("APC") for Open Access articles. Where the Submitting Author wishes to make the Work available on an Open Access basis (and intends to pay the relevant APC), the terms of reuse of such Open Access shall be governed by a Creative Commons licence – details of these licences and which [Creative Commons](#) licence will apply to this Work are set out in our licence referred to above.

Other than as permitted in any relevant BMJ Author's Self Archiving Policies, I confirm this Work has not been accepted for publication elsewhere, is not being considered for publication elsewhere and does not duplicate material already published. I confirm all authors consent to publication of this Work and authorise the granting of this licence.

1  
2  
3  
4  
5  
6  
7  
8  
9  
10  
11  
12  
13  
14  
15  
16 Evaluation of Emergency Care Education and Triage Implementation: an observational study at a  
17 hospital in rural Liberia  
18

19  
20 Towns, Kathleen (0000-0003-2017-0229)\*<sup>1,2</sup>, Dolo, Isaac\*<sup>3</sup>, Pickering, Ashley<sup>4</sup>, Ludmer,  
21 Nicholas<sup>2,5</sup>, Karanja, Viola<sup>3</sup>, Marsh, Regan H.<sup>2,6</sup>, Horace, Minnie<sup>7</sup>, Dweh, Denny<sup>3</sup>, Dalieh,  
22 Tresa<sup>3</sup>, Myers, Sharon<sup>3</sup>, Bukhman, Alice<sup>2,6</sup>, Gashi, Jason<sup>8</sup>, Sonenthal, Paul<sup>2,6</sup>, Ulysse, Patrick<sup>2,3</sup>,  
23 Cook, Rebecca<sup>2,6</sup>, Rouhani, Shada A.<sup>2,6</sup>  
24

25 \*Co-first authors  
26

27 <sup>1</sup>University of Michigan, Ann Arbor, MI, USA

28 <sup>2</sup>Partners In Health, Boston, MA, USA

29 <sup>3</sup>Partners In Health, Liberia

30 <sup>4</sup>University of Colorado Anschutz Medical Campus, Aurora, CO, USA

31 <sup>5</sup>University of Chicago, Chicago, IL, USA

32 <sup>6</sup>Harvard Medical School, Boston, MA, USA

33 <sup>7</sup>McGill University, Montreal, Canada

34 <sup>8</sup>Boston University, Boston, MA, USA  
35  
36  
37

38 Correspondence to: Kathleen Towns; [katrobin@med.umich.edu](mailto:katrobin@med.umich.edu)  
39

40 Word Count: 3,298  
41  
42  
43  
44  
45  
46  
47  
48  
49  
50  
51  
52  
53  
54  
55  
56  
57  
58  
59  
60

## ABSTRACT

### Introduction

In Liberia, emergency care is still in its early development. In 2019, two emergency care and triage education sessions were done at J. J. Dossen Hospital in Southeastern Liberia. The observational study objectives evaluated key process outcomes before and after the educational interventions.

### Methods

Emergency Department paper records from February 1, 2019 to December 31, 2019 were retrospectively reviewed. Simple descriptive statistics were used to describe patient demographics and Chi-Square analyses were used to test for significance. Odds ratios were calculated for key pre-determined process measures.

### Results

There were 8,222 patient visits recorded that were included in our analysis. Patients in the post-intervention 1 group had higher odds of having a documented full set of vital signs compared to the baseline group (16% v 3.5%, OR 5.4 (95% CI 4.3 to 6.7)). After triage implementation, patients who were triaged were 16 times more likely to have a full set of vitals compared to those who were not triaged. Similarly, compared to the baseline group, patients in the post-intervention 1 group had higher odds of having a glucose documented if they presented with altered mental status or a neurologic complaint (37% v 30%, OR 1.7 (CI 1.3 to 2.2)), documented antibiotic administration if they had a presumed bacterial infection (87% v 35%, OR 12.8 (CI 8.8 to 17.1)),

1  
2  
3 documented malaria test if presenting with fever (76% v 61%, OR 2.05 (CI 1.37 to 3.08)) or  
4  
5 documented repeat set of vitals if presenting with shock (25% v 6.6%, OR 8.85 (CI 1.67 to  
6  
7 14.06)). There was no significant difference in the above process outcomes between the  
8  
9 education interventions.  
10  
11  
12  
13

## 14 **Conclusion**

15  
16  
17 This study showed improvement in most process measures between the baseline and post-  
18  
19 intervention 1 groups, benefits that persisted post-intervention 2, thus supporting the importance  
20  
21 of short-course education interventions to durably improve facility-based care.  
22  
23  
24  
25

## 26 **Strengths and Limitations of this study**

- 27  
28 • **This study contributes to limited research on educational interventions in LMICs --**  
29  
30 **where emergency care is in its infancy – by evaluating changes in care processes as a**  
31  
32 **result of educational interventions.**
- 33  
34 • **This study evaluated both pediatric and adult populations which fully represents the**  
35  
36 **patient population presenting to the emergency department.**
- 37  
38 • **This is an observational cross-sectional study, so causality cannot be established.**
- 39  
40 • **This is a single center study and generalizability of results is unknown.**
- 41  
42 • **The study design retrospectively reviewed documents and did not include direct**  
43  
44 **observations which may not fully represent actual practice.**
- 45  
46  
47  
48  
49  
50  
51  
52  
53  
54  
55  
56  
57  
58  
59  
60

## INTRODUCTION

Emergency care has been increasingly recognized as a fundamental component to strengthening health systems<sup>1-5</sup> and an effective means to address multiple Sustainable Development Goals and reduce the overall burden of disease.<sup>1,6</sup> An estimated 54% of annual deaths in low and middle-income countries (LMICs) could be addressed by pre-hospital and hospital-based emergency care.<sup>7</sup> More specifically, injury related mortality disproportionately affects LMICs, and accounts for more than 90% of the total global mortality related to injury.<sup>8</sup> Timely emergency care saves lives across the spectrum of illness from injuries to acute presentations of chronic disease and is the first contact with the health system for many individuals.<sup>1-2,9-10</sup>

Emergency care in Liberia, like many LMICs, is still in its early development. In 2007, emergency care was first included in Liberia's national health plan and basic package of health services.<sup>11,12</sup> There has been some development of emergency education at the national referral hospital in the capital of Monrovia; however, no other consistent or standardized emergency medicine curriculum has been established.<sup>13</sup> The basic package of health services outlines the essentials of emergency care for each level of service.<sup>11</sup> Currently, there are no formal indicators measuring care or process outcomes for emergency care nationally.

In 2014, the Ebola outbreak led to the near-collapse of the country's already weakened health system, which was recovering from recent civil war (1989-1996 and 1999-2003).<sup>13-15</sup> In 2015, responding to the Ebola epidemic, the global non-profit organization Partners In Health (PIH), at the invitation of and in partnership with the Liberian government, came to Liberia to support the emergency response and long-term strengthening of the health system. Given clear emergency

1  
2  
3 care needs in Maryland County, a key goal of PIH's became to expand and strengthen  
4  
5 emergency services, which included developing the health workforce capacity to provide high-  
6  
7 quality emergency care with the support of emergency care education sessions and triage  
8  
9 implementation. The objective of this observational study was to evaluate key process outcomes  
10  
11 before and after triage implementation and emergency care education interventions to assess its  
12  
13 impact on quality of care and identify areas for future improvement.  
14  
15  
16  
17  
18

## 19 **METHODS**

### 20 **Study Design**

21  
22 An observational, retrospective cross-sectional study of patients presenting to a regional hospital  
23  
24 ED in Southeastern Liberia.  
25  
26  
27  
28  
29

### 30 **Study Setting**

31  
32 The observational study was carried out at JJD, the only county referral hospital in rural,  
33  
34 Southeastern Liberia. It is a government-run hospital supported by PIH and provides services  
35  
36 free of charge. JJD serves a primary catchment area of 187,000 people in Maryland county, and  
37  
38 receives additional referrals from neighboring counties.<sup>16</sup> At the time of the education  
39  
40 interventions, JJD's 8-bed ED was primarily staffed by nurses and physician's assistant. There  
41  
42 was no trained emergency medicine physician at the hospital. Specialists in the four core clinical  
43  
44 departments of pediatrics, internal medicine, surgery and obstetrics and gynecology provide  
45  
46 back-up clinical support to the ED in their respective clinical areas as needed. Prior to 2019,  
47  
48 none of the ED staff had specific emergency care education courses. In addition to nurses and  
49  
50  
51  
52  
53  
54  
55  
56  
57  
58  
59  
60



1  
2  
3 PAs, nursing aides and nursing students worked within the ED; after triage was implemented in  
4  
5 May 2019, nursing aides primarily staffed ED triage.  
6  
7  
8  
9

### 10 **Education Interventions**

11  
12 A series of education interventions were undertaken with ED staff, that included both nurses and  
13  
14 physician assistants, to train them on the implementation of the Integrated Interagency Triage Tool  
15  
16 (IIATT) and completion of the WHO Basic Emergency Care course. For the first intervention, a  
17  
18 series of education sessions were conducted to improve emergency care at JJD in late April and  
19  
20 early May 2019. First, staff were trained on the WHO-ICRC-MSF integrated interagency triage  
21  
22 tool through didactics followed by real-time supervision and mentorship on the implementation  
23  
24 of triage.<sup>17-19</sup> Triage is an essential component of emergency care; it evaluates a patient's acuity  
25  
26 and prioritizes evaluation and treatment based on the severity of the patient's condition.<sup>6</sup> The  
27  
28 IIATT assigns patients to a 3-tier acuity system, based on specified symptoms, physical signs,  
29  
30 and high risk vital signs.<sup>17-19</sup>  
31  
32  
33  
34  
35  
36  
37

38 Following the IIATT training, 12 staff received 2 weeks of education on the WHO Basic  
39  
40 Emergency Care (BEC) course, followed by the complementary PIH Fundamentals of  
41  
42 Emergency Care training. The WHO BEC course was composed of didactic, small group  
43  
44 sessions and skills session, designed to train staff to identify and manage acute illnesses and  
45  
46 injuries with limited resources.<sup>20,21</sup> The supplemental PIH course included additional topics (eg.  
47  
48 approach to conditions such as abdominal pain and fevers), and skills such as basic EKG and  
49  
50 ultrasound. The didactic courses were followed by two weeks of clinical mentorship by a visiting  
51  
52  
53  
54  
55  
56  
57  
58  
59  
60

1  
2  
3 faculty emergency physician. Afterwards, ongoing occasional clinical mentorship was supported  
4  
5 by non-EM faculty who worked at JJD.  
6  
7  
8  
9

10 In mid-October 2019, 16 JJD staff participated in a three-day refresher education session. Five  
11  
12 participants had not completed the initial education intervention, so received a pre-course one-  
13  
14 day intensive training on key concepts covered previously. An emergency physician assistant  
15  
16 provided ongoing clinical mentorship 4 days a week for the subsequent 3 months.  
17  
18  
19  
20

### 21 **Study Population**

22  
23 The study was conducted from February 1, 2019 to December 31, 2019. During this period, all  
24  
25 patients presenting to the JJD ED for whom a visit was either documented in the ED ledger or a  
26  
27 separate paper chart were included in the study.  
28  
29  
30  
31  
32

### 33 **Data Collection**

34  
35 Trained data collectors extracted information from the paper ED records into a pre-developed  
36  
37 data extraction tool. Prior to May 2019, all initial visit documentation occurred exclusively in the  
38  
39 ED ledger, including demographics, reason for the visit, vital signs, lab testing, key results,  
40  
41 diagnosis, and disposition. After May 2019, documentation included three sources: the ED  
42  
43 ledger, an ED triage form, and a ED provider documentation form adapted from the WHO  
44  
45 Emergency Unit forms.<sup>22</sup> These forms were introduced in May 2019 and used by staff  
46  
47 performing the initial evaluation and resuscitation. The ED ledger was a bound book with paper  
48  
49 records, described above. The ED triage form documented triage acuity based on presenting  
50  
51 symptoms and vital signs based on the interagency integrated triage tool. The ED provider  
52  
53  
54  
55  
56  
57  
58  
59  
60

1  
2  
3 documentation form included sections for vital signs, chief complaint, primary survey, history of  
4 presenting illness, review of systems, past medical history, assessment, and plan. Data collectors  
5 reviewed all these source and recorded demographics, initial vital signs, select clinical process  
6 measures and outcome variables.  
7  
8  
9  
10  
11  
12  
13  
14

### 15 **Variables and Outcomes**

16  
17 We classified visits from February 1, 2019 to April 30, 2019 as “pre-intervention”, visits from  
18 May 29, 2019 to October 13, 2019 as “post-intervention 1”, and October 21, 2019 to December  
19 31, 2019 as “post-intervention 2.” Visits from May 1, 2019 to May 28, 2019 and October 14,  
20 2019 to October 20, 2019 were considered to be in “intermediate” time periods (e.g., time  
21 periods during the education sessions themselves) and excluded from comparative analyses (as  
22 seen in figure 1). Data with missing date and age variables were also excluded from the analysis.  
23  
24  
25  
26  
27  
28  
29  
30  
31  
32

33 Due to differences in documentation standards prior to the ED education session, we focused our  
34 analyses on variables and process metrics that were reliably and routinely captured in the JJD ED  
35 register. The study team reviewed process metrics recommended by the African Federation of  
36 Emergency Medicine, as well as a review of quality metrics used in LMIC EDs.<sup>23,24</sup> From these  
37 lists, study outcomes were chosen based on local context, hospital and government priorities, and  
38 pre-existing documentation patterns that determined what baseline data was available. Outcomes  
39 focused primarily on the effectiveness domain of quality of care.<sup>25</sup> The primary study outcome  
40 was a complete set of recorded vital signs at any time during the patient’s ED visit and was  
41 chosen given the importance of vital signs to triage and emergency care.<sup>26,27</sup> A full set of vitals  
42 for patients age 5 and over includes heart rate, respiratory rate, oxygen saturation, blood pressure  
43  
44  
45  
46  
47  
48  
49  
50  
51  
52  
53  
54  
55  
56  
57  
58  
59  
60

1  
2  
3 and temperature. A full set of vitals for patients under age 5 includes heart rate, respiratory rate,  
4 oxygen saturation and temperature. Blood pressure was not reliably recorded in this younger age  
5 group so was not included.  
6  
7  
8  
9

10  
11  
12 Secondary outcomes examined included documentation of: blood glucose for patients presenting  
13 with altered mental status or a neurologic complaint; antibiotic administration or prescription in  
14 patients with a presumed bacterial infection; malaria diagnostic testing in patients with  
15 temperature  $\geq 38^{\circ}\text{C}$ ; oxygen administration for hypoxia; repeat vital signs for shock; and  
16 intravenous fluids for shock (hypoxia and shock were defined by age, Table 1). A physician  
17 assistant interpreted the final diagnoses to determine if the visit was due to a presumed bacterial  
18 infection. In the absence of microbiology capability to perform cultures and accounting for local  
19 context and practice patterns, all diagnoses of pneumonia, urinary tract infections, meningitis,  
20 cellulitis, and sepsis were presumed to have been bacterial. Tuberculosis (TB) was excluded  
21 from the list of bacterial infections, as TB patients are referred to TB clinic to initiate treatment  
22 and therefore not reliably documented as part of ED care. A patient was coded as a neurologic  
23 complaint if the clinical documentation included altered mental status, weakness, dizziness, or  
24 seizures.  
25  
26  
27  
28  
29  
30  
31  
32  
33  
34  
35  
36  
37  
38  
39  
40  
41  
42  
43  
44  
45  
46  
47  
48  
49  
50  
51  
52  
53  
54  
55  
56  
57  
58  
59  
60

|                                                                                                                 |                                                      |
|-----------------------------------------------------------------------------------------------------------------|------------------------------------------------------|
| Hypoxia                                                                                                         |                                                      |
| Age ≤ 5 years                                                                                                   | SpO <sub>2</sub> ≤ 94%                               |
| Age > 5 years                                                                                                   | SpO <sub>2</sub> ≤ 92%                               |
| Fever                                                                                                           | temperature ≥ 38°C                                   |
| Shock Vitals                                                                                                    |                                                      |
| Age 0 to < 1 years*                                                                                             | HR > 160bpm                                          |
| Age ≥ 1 to < 3 years*                                                                                           | HR > 160bpm                                          |
| Age ≥ 3 to < 5 years*                                                                                           | HR > 140bpm                                          |
| Age ≥ 5 to < 13 years                                                                                           | HR of ≥ 130bpm or a systolic blood pressure < 70mmHg |
| Age ≥ 13 years                                                                                                  | HR of ≥ 130bpm or a systolic blood pressure < 80mmHg |
| *Note: Blood pressure was not included as a criterion in the younger age groups as it is not reliably recorded. |                                                      |

## Data Analysis

Data was transcribed into Excel, then imported into and analyzed with Stata (Version 15).<sup>28</sup>

Simple descriptive statistics were used to describe the patient demographics and Chi-Square analyses were used to test for significance using a nominal threshold of 0.05. Odds ratios and 95% confidence intervals were calculated for pre-determined process measurements as described above.

## Patient and Public Involvement

Patients and/or the public were not involved in the design, conduct, reporting or dissemination plans of this research.

## RESULTS

There were 8,774 patient visits recorded in the JJD ED from February 1, 2019 to December 31, 2019 and included in our analysis: 2,732 in the pre-intervention time period, 3,194 in the ‘post-intervention 1’ time period, 2,296 in the ‘post-intervention 2’ time period, and 552 in the ‘indeterminate’ time periods, which were excluded from the analysis (Table 2).

| Age [Years] | Male<br>n (%) | Female<br>n (%) | Gender Missing<br>n (%) | Total<br>n (%) |
|-------------|---------------|-----------------|-------------------------|----------------|
| 0 - <5      | 1,102 (52.9)  | 954 (45.8)      | 29 (1.4)                | 2,085 (25.4)   |
| 5 - <18     | 858 (47.6)    | 917 (50.9)      | 26 (1.4)                | 1,801 (21.9)   |
| 18+         | 2,015 (47.6)  | 2,183 (51.6)    | 36 (0.9)                | 4,234 (51.5)   |
| Age Missing | 40 (39.2)     | 56 (54.9)       | 6 (5.9)                 | 102 (1.2)      |
| Total       | 4,015 (48.6)  | 4,110 (54.9)    | 97 (1.2)                | 8,222          |

<sup>^</sup>Includes all patients from pre-intervention, post-intervention 1, and post-intervention 2 time periods.

In the baseline time period, only 3.5% of patients had a complete set of vital signs documented (Table 3). In both post-intervention 1 and post-intervention 2 time periods, patients had higher odds of having a documented full set of vital signs (16% OR 5.4 (95% CI 4.3-6.7)). Adults were statistically more likely than children to have a documented full set of vitals (OR 1.43 (95% CI 1.26-1.62) (Table 4). Triage, implemented as part of the first education intervention, significantly influenced the likelihood of having a full set of vital signs recorded: patients who were triaged were 16 times more likely to have a full set of vitals compared to those in the same time periods who were not triaged (60% v 8.6%, OR 15.9 (95% CI 13.37-18.91)). There was no difference in vital signs obtained by gender.

All process outcomes measured showed significant quality improvements in the post-intervention groups compared to the baseline group, except the percent of patients with shock documented to receive IV fluids (Table 5). After the initial education session, patients had higher

odds of having a glucose documented for altered mental status or neurologic complaints (37% v 30%, OR 1.7 (95% CI 1.3-2.2)). Patients also had higher odds of having antibiotics documented for presumed bacterial infections (87% v 35%, OR 12.8 (95% CI 8.8-17.1)) and documented malaria diagnostic testing for fever (76% v 61%, OR 2.05 (1.37-3.08)) in the post-intervention 1 time periods. Additionally, patients presenting with shock were more likely to have a repeat set of vital signs documented (25% v 6.6%, OR 8.85 (1.67-14.06)). Although there was no statistically significant difference between pre-intervention and post-intervention 1 in patients presenting with hypoxia documented to receive oxygen, there was a statistical difference between post-intervention 2 and pre-intervention time periods (35.7% v 11.1%, OR 4.44 (1.15 to 17.25)). There were no significant differences between the post-intervention 1 and post-intervention 2 groups on any metrics. Metrics did not vary significantly by age group.

|                       | Pre-intervention<br>(n=2,732) | Post-intervention 1<br>(n=3,194) |                                                      | Post-intervention 2<br>(n=2,296) |                                                      | Odds ratio <sup>^</sup><br>(95%CI)<br>compared to post-intervention 1 |
|-----------------------|-------------------------------|----------------------------------|------------------------------------------------------|----------------------------------|------------------------------------------------------|-----------------------------------------------------------------------|
|                       | n (%)                         | n (%)                            | Odds ratio* (95% CI)<br>compared to pre-intervention | n (%)                            | Odds ratio* (95% CI)<br>compared to pre-intervention |                                                                       |
| Heart rate            | 925 (33.9)                    | 1,763 (55.2)                     | 2.41 (2.17 to 2.67)                                  | 1,183 (51.5)                     | 2.08 (1.85 to 2.33)                                  | 0.86 (0.77 to 0.96)                                                   |
| Respiratory rate      | 132 (4.8)                     | 647 (20.3)                       | 5.00 (4.12 to 6.08)                                  | 449 (19.6)                       | 4.79 (3.91 to 5.87)                                  | 0.96 (0.84 to 1.10)                                                   |
| Oxygen saturation     | 656 (24.0)                    | 1,511 (47.3)                     | 2.84 (2.54 to 3.18)                                  | 960 (41.8)                       | 2.27 (2.02 to 2.57)                                  | 0.80 (0.72 to 0.89)                                                   |
| Blood pressure        | 888 (32.5)                    | 1,580 (49.5)                     | 2.03 (1.83 to 2.26)                                  | 942 (41.0)                       | 1.44 (1.29 to 1.62)                                  | 0.71 (0.64 to 0.79)                                                   |
| Temperature           | 1,721 (63.0)                  | 2,201 (68.9)                     | 1.30 (1.17 to 1.45)                                  | 1,752 (76.3)                     | 1.89 (1.67 to 2.14)                                  | 1.45 (1.28 to 1.64)                                                   |
| AVPU**                | 0                             | 458 (14.3)                       | n/a                                                  | 274 (11.9)                       | n/a                                                  | 0.81 (0.69 to 0.95)                                                   |
| Weight                | 190 (7.0)                     | 715 (22.4)                       | 3.86 (3.26 to 4.57)                                  | 456 (19.9)                       | 3.32 (2.77 to 3.97)                                  | 0.86 (0.75 to 0.98)                                                   |
| Full set of vitals*** | 95 (3.5)                      | 516 (16.2)                       | 5.35 (4.27 to 6.70)                                  | 372 (16.2)                       | 5.37 (4.25 to 6.77)                                  | 1.01 (0.87 to 1.16)                                                   |

\*Odds ratios calculated with pre-intervention group as baseline odds.  
<sup>^</sup>Odds ratios calculated for post-intervention 2 group with post-intervention 1 group as baseline odds.  
\*\* AVPU assesses level of consciousness as either Alert, responds to Verbal stimuli, responds to Pain, Unresponsive. It is a system to assess the level of consciousness in a patient.  
\*\*\*A full set of vitals for patients age 5 and over includes heart rate, respiratory rate, oxygen saturation, blood pressure and temperature. A full set of vitals for patients under age 5 includes heart rate, respiratory rate, oxygen saturation and temperature

1  
2  
3  
4  
5  
6  
7  
8  
9  
10  
11  
12  
13  
14  
15  
16  
17  
18  
19  
20  
21  
22  
23  
24  
25  
26  
27  
28  
29  
30  
31  
32  
33  
34  
35  
36  
37  
38  
39  
40  
41  
42  
43  
44  
45  
46  
47  
48  
49  
50  
51  
52  
53  
54  
55  
56  
57  
58  
59  
60

|                                   | Age 0 - <5<br>(n=1,401) | Age 5 - <18<br>(n=1,214) |                                                         | Age 18+<br>(n=2,801) |                                                        |                                                                   |
|-----------------------------------|-------------------------|--------------------------|---------------------------------------------------------|----------------------|--------------------------------------------------------|-------------------------------------------------------------------|
|                                   | n (%)                   | n (%)                    | Odds ratio* (95%<br>CI) compared to<br>age-group 0 - <5 | n (%)                | Odds ratio*(95% CI)<br>compared to age-group<br>0 - <5 | Odds ratio^ (95% CI)<br>compared to combined<br>age-group 0 - <18 |
| Heart rate                        | 517 (36.9)              | 526 (43.3)               | 1.31 (1.12 to 1.53)                                     | 1,849 (66)           | 3.32 (2.91 to 3.8)                                     | 2.93 (2.62 to 3.27)                                               |
| Respiratory rate                  | 245 (17.5)              | 211 (17.4)               | 0.99 (0.81 to 1.22)                                     | 621 (22.2)           | 1.34 (1.14 to 1.58)                                    | 1.35 (1.18 to 1.54)                                               |
| Oxygen saturation                 | 466 (33.3)              | 432 (35.6)               | 1.11 (0.94 to 1.30)                                     | 1,527 (54.5)         | 2.4 (2.1 to 2.75)                                      | 2.29 (2.05 to 2.56)                                               |
| Blood pressure                    | 167 (11.9)              | 399 (32.9)               | 3.62 (3 to 4.42)                                        | 1,904 (68)           | 15.68 (13.1 to 18.78)                                  | 7.68 (6.8 to 8.68) <sup>%</sup>                                   |
| Temperature                       | 1,107 (79)              | 898 (74)                 | 0.75 (0.63 to 0.90)                                     | 1,898 (67.8)         | 0.56 (0.48 to 0.65)                                    | 0.64 (0.57 to 0.72)                                               |
| AVPU <sup>**</sup>                | 149 (10.6)              | 142 (11.7)               | 1.11 (0.87 to 1.42)                                     | 418 (14.9)           | 1.47 (1.21 to 1.8)                                     | 1.4 (1.19 to 1.64)                                                |
| Weight                            | 528 (37.7)              | 304 (25)                 | 0.55 (0.47 to 0.65)                                     | 324 (11.6)           | 0.22 (0.18 to 0.25)                                    | 0.28 (0.24 to 0.32)                                               |
| Full set of vitals <sup>***</sup> | 216 (15.4)              | 134 (11)                 | 0.58 (0.54 to 0.86)                                     | 520 (18.6)           | 1.25 (1.05 to 1.49)                                    | 1.48 (1.27 to 1.71)                                               |

<sup>\*</sup>This includes all patients after post-intervention 1 and post-intervention 2, (excluding those in the pre-intervention, intermediate time period and those patients missing an age)

<sup>\*</sup>Odds ratios calculated with age-group 0-5 as baseline odds.

<sup>^</sup>Odds ratios calculated for combined age-group 18+ with combined age groups 0 - <5 and 5 - <18 as baseline odds.

<sup>%</sup>Note that blood pressure may be less reliably measured...

<sup>\*\*</sup> AVPU- Alert, Verbal, Pain, Unresponsive. It is a system to assess the level of consciousness in a patient.

<sup>\*\*\*</sup>A full set of vitals for patients age 5 and over includes heart rate, respiratory rate, oxygen saturation, blood pressure and temperature. A full set of vitals for patients under age 5 includes heart rate, respiratory rate, oxygen saturation and temperature.



Table 5. Documented process outcomes by intervention period

|                                                                                                                                                                                                                                                                                | Pre-intervention  | Post-intervention 1 |                                                   | Post-intervention 2 |                                                   |                                                     |
|--------------------------------------------------------------------------------------------------------------------------------------------------------------------------------------------------------------------------------------------------------------------------------|-------------------|---------------------|---------------------------------------------------|---------------------|---------------------------------------------------|-----------------------------------------------------|
|                                                                                                                                                                                                                                                                                | n of total (%)    | n of total (%)      | Odds ratio* (95% CI) compared to pre-intervention | n of total (%)      | Odds ratio* (95% CI) compared to pre-intervention | Odds ratio^ (95%CI) compared to post-intervention 1 |
| Glucose test documented, among those with a neurologic chief complaint                                                                                                                                                                                                         | 145 of 560 (25.9) | 254 of 672 (37.1)   | 1.74 (1.36 to 2.22)                               | 169 of 469 (35.2)   | 1.61 (1.23 to 2.11)                               | 0.93 (0.73 to 1.18)                                 |
| <b>Antibiotics documented, among those with a final diagnosis of presumed bacterial infection</b>                                                                                                                                                                              | 154 of 441 (34.8) | 415 of 478 (86.5)   | 12.28 (8.83 to 17.07)                             | 335 of 388 (85.7)   | 11.78 (8.30 to 16.71)                             | 0.96 (0.65 to 1.42)                                 |
| Malaria test recorded, among those with a documented fever                                                                                                                                                                                                                     | 139 of 229 (60.7) | 168 of 221 (76.0)   | 2.05 (1.37 to 3.08)                               | 179 of 242 (74.0)   | 1.84 (1.24 to 2.72)                               | 0.91 (0.59 to 1.38)                                 |
| <b>Oxygen delivery recorded, among those with documented hypoxia</b>                                                                                                                                                                                                           | 3 of 27 (11.1)    | 20 of 71 (28.2)     | 3.14 (0.85 to 11.59)                              | 15 of 42 (35.7)     | 4.44 (1.15 to 17.25)                              | 1.42 (0.63 to 3.20)                                 |
| Repeat set of vital signs recorded, among those with initial shock vital signs**                                                                                                                                                                                               | 4 of 61 (6.6)     | 49 of 193 (25.4)    | 8.85 (1.67 to 14.06)                              | 34 of 135 (25.2)    | 4.80 (1.62 to 14.21)                              | 0.99 (0.60 to 1.64)                                 |
| <b>IVF documented, among those with initial shock vital signs**</b>                                                                                                                                                                                                            | 16 of 45 (35.6)   | 41 of 192 (21.4)    | 0.76 (0.39 to 1.49)                               | 23 of 135 (17.0)    | 0.58 (0.28 to 1.19)                               | 0.76 (0.43 to 1.33)                                 |
| *Odds ratios calculated with pre-intervention group as baseline odds<br>^Odds ratios calculated for post-intervention 2 group with post-intervention 1 group as baseline odds.<br>** Shock identified by appropriate vital signs according to age.<br>IVF = Intravenous fluids |                   |                     |                                                   |                     |                                                   |                                                     |

## DISCUSSION

The study evaluated key quality process metrics before and after emergency care education sessions at a rural Liberian hospital. Almost all metrics improved after the education sessions compared to baseline, though additional gains were not seen with a second clinical training.

Notably, patients who were triaged in the post-intervention time periods showed significant gains

1  
2  
3 in having full sets of vital signs documented compared to patients in the same time period who  
4 were not triaged. Our study supports clinical trainings and triage training and implementation as  
5 an important step in improving care quality.  
6  
7  
8  
9

10  
11  
12 Pre-intervention, few patients had full sets of vital signs documented. Vital signs are an essential  
13 part of a patient's clinical evaluation, can detect serious illness, and help monitor for clinical  
14 deterioration.<sup>27,29</sup> Post-interventions, the odds of having a full set of vitals increased five-fold.  
15  
16  
17 Notably, patients who were triaged were nearly 16 times as likely to have a full set of vitals than  
18 those who were not, even in the same time period, suggesting that small interventions can be  
19 associated with improved emergency care.  
20  
21  
22  
23  
24  
25

26  
27  
28 Despite these gains, few patients overall had a full set of vitals documented post-interventions  
29 (16.2%). There are several likely contributing factors to this. First, due to the limited human  
30 resources, triage was inconsistently implemented. Without triage, vitals were performed by the  
31 providers themselves as they evaluated patients. Due to the volume of patients, boarding patients  
32 within the ED, and human resource constraints, anecdotal reports suggest providers often only  
33 obtained partial or forwent vitals due to time pressure. In addition, providers were observed to  
34 not consistently record vitals they obtained, particularly when the ED was very busy.  
35  
36  
37

38  
39  
40 Additionally, equipment constraints likely impacted efficiency, as VS machines are limited, and  
41 with intermittent electricity, automated machines were not always functional. Similarly, limited  
42 availability of specific age-appropriate vital sign equipment may have led to variability amongst  
43 age groups.  
44  
45  
46  
47  
48  
49  
50  
51  
52  
53

1  
2  
3 Large gains were seen in documented antibiotic administration among patients with presumed  
4 bacterial infections and in patients with shock receiving repeat vital signs. Patients presenting to  
5 the ED with a presumed bacterial infection were over 12 times more likely to have antibiotics  
6 documented after the initial emergency care education session, and patients presenting to the ED  
7 in shock were nearly nine times more likely to have repeat vital signs documented. These  
8 significant gains have the potential to reduce morbidity and mortality from sepsis, a significant  
9 contribution to the burden of disease in LMICs.<sup>30,31</sup> These findings suggest that limited  
10 emergency care education sessions are associated with improved quality of emergency care  
11 provided by front-line providers and nurses. There is also a possibility that any improvement in  
12 outcomes is unrelated to the education sessions and due to other factors not evaluated. For  
13 example, overall improvement in documentation over time could have impacted results as vital  
14 signs and/or recording of interventions could have been performed more often than what was  
15 previously captured. Additionally, as noted above, any increased or decreased accessibility to  
16 equipment or supplies could have unclear contributions to the results. Future randomized studies  
17 should be considered to quantify the impact.  
18  
19  
20  
21  
22  
23  
24  
25  
26  
27  
28  
29  
30  
31  
32  
33  
34  
35  
36  
37  
38  
39

40 The similarity of outcomes in the post-intervention 1 and post-intervention 2 time periods may  
41 also be impacted by limitations of human resources and equipment. Staff turnover in the ED is  
42 relatively high. Attrition meant that 31% of the participants in intervention 2 were receiving  
43 initial training rather than re-training, possibly limiting impact. Also, the presence of ED-trained  
44 supervisors was intermittent, limiting the exposure of the staff to daily supervision and  
45 mentorship to help fortify the training. In addition, several of the process metrics depended on  
46 the availability of supplies or equipment. Our findings likely reflect a need for comprehensive  
47  
48  
49  
50  
51  
52  
53  
54  
55  
56  
57  
58  
59  
60

1  
2  
3 health system strengthening, of which education sessions are only one component. Increases in  
4 overall health financing are also needed to expand the availability of staff and materials to  
5 improve patient care. Additionally, further evaluation is needed to identify the best ways for  
6 ongoing continuing medical education and staff support. Aside from these explanations, the  
7 similarity of outcomes in post-intervention 1 and post-intervention 2 time periods could reflect  
8 that the additional education session was necessary to ensure continued higher quality care and to  
9 keep metrics stable. If the second educational intervention did not take place, it is possible the  
10 outcomes could have been worse, especially without daily supervision or mentorship.  
11  
12  
13  
14  
15  
16  
17  
18  
19  
20  
21  
22  
23

## 24 **LIMITATIONS**

25  
26 This study's results must be considered within the context of its design. One notable limitation is  
27 that our method of measuring process metrics was documentation by the ED care provider and  
28 not direct observation of whether the care was provided. Particularly in an understaffed  
29 environment with many competing clinical demands and without administrative processes to  
30 hold providers accountable for their documentation, documentation may lag behind actual  
31 performance of tasks. There is also the risk of bias where providers document inaccurately,  
32 however, we suspect that under-reporting was likely the larger contributor. In the local care  
33 context, care processes such as placing oxygen on the patient or giving IV fluids do not require  
34 an order and thus might not be documented in the patient chart.  
35  
36  
37  
38  
39  
40  
41  
42  
43  
44  
45  
46  
47  
48

49 Given data systems at the hospital, we relied on retrospective data entry from paper records. It is  
50 possible additional interventions or vital sign measurements were performed but not  
51 documented. There may be unknown missing patient data, due to mixed methods of chart  
52  
53  
54  
55  
56  
57  
58  
59  
60

1  
2  
3 documentation. There was potential for missing data in the month of June, which had less data  
4  
5 points when compared to the remaining months. Second, although this study suggests the  
6  
7 interventions are associated with increases in quality metrics, causality cannot be established. In  
8  
9 addition, we cannot rule out confounding between metrics and/or unmeasured variables, for  
10  
11 example if increased rates of full sets of vital signs measured contributed to a higher likelihood  
12  
13 of receiving repeat vitals. Future studies should address this. Third, the study looked at  
14  
15 interventions as binary variables, but did not assess if the details of the intervention were  
16  
17 appropriate to an individual patient. Finally, this study was conducted at a single site in rural  
18  
19 Liberia that had not received any prior emergency care training and the generalizability of our  
20  
21 findings is unknown.  
22  
23  
24  
25  
26  
27

## 28 **CONCLUSION**

29  
30 This study demonstrated an improvement in most process metrics after the implementation of  
31  
32 triage and emergency care training in rural Liberia, supporting the utility of short-course  
33  
34 interventions on facility-based care. This complements other evaluations of BEC trainings,  
35  
36 which demonstrated increased emergency care knowledge and confidence.<sup>20,21</sup> However,  
37  
38 additional gains were not seen with a re-training several months later. Further exploration is  
39  
40 needed to determine and intervene on other factors that influence quality metrics as well as the  
41  
42 best methods for ongoing continue medical education and staff support.  
43  
44  
45  
46  
47  
48

## 49 **FOOTNOTES**

### 50 **Data Availability Statement**

51  
52  
53  
54  
55  
56  
57  
58  
59  
60

1  
2  
3 All data relevant to the study are included in the article or uploaded as supplementary  
4 information.  
5  
6

### 7 **Patient consent for publication**

8  
9  
10 The IRB approved a Waiver of informed consent given the study was a chart review study, so  
11 informed consent was not obtained.  
12  
13  
14

### 15 **Ethics Approval**

16  
17  
18 The study was approved by the Partners Healthcare IRB 2019P001944 as well as approved under  
19 the University of Liberia-Pacific Institute for Research and Evaluation IRB 17-06-048 as part of  
20 the clinical and training protocol that Partners In Health Liberia submits annually for review.  
21  
22  
23

24  
25  
26 **Contributors:** KT, ID, AP, VK, RHM, PU, RC, SAR contributed to study design. KT, ID, AP,  
27 NL, VK, RHM, MH, AB, RC, SAR implemented the emergency care trainings. KT, ID, DD, TD,  
28 SM contributed to data collection. KT, ID, JG, PS, SAR contributed to data analysis. All authors  
29 contributed to interpretation of study results. KT and ID drafted the initial version of the  
30 manuscript. All authors contributed to the revision of the manuscript and have approved the final  
31 manuscript version. KT and ID were equal contributors. KT is responsible for this paper and  
32 content as a guarantor.  
33  
34  
35  
36  
37  
38  
39  
40  
41

42  
43 **Funding:** This work was funded by the Ansara Family Foundation; funders did not have any  
44 role in study design or the analysis or publication of results.  
45  
46

47 **Competing Interests:** None declared.  
48

49 **Figure 1 Education Intervention Timeline 2019:** Figure 1 shows the timeline of the study  
50 including education session time periods, the time periods pre and post-interventions, as well as  
51 time periods where mentorship was provided.  
52  
53  
54  
55  
56  
57  
58  
59  
60

1  
2  
3  
4  
5  
6  
7  
8  
9  
10  
11  
12  
13  
14  
15  
16  
17  
18  
19  
20  
21  
22  
23  
24  
25  
26  
27  
28  
29  
30  
31  
32  
33  
34  
35  
36  
37  
38  
39  
40  
41  
42  
43  
44  
45  
46  
47  
48  
49  
50  
51  
52  
53  
54  
55  
56  
57  
58  
59  
60

For peer review only

## REFERENCES

1. Jamison DT, Gelband H, Horton S, et al. Disease Control Priorities: Improving Health and Reducing Poverty [Internet]. Vol 9. 3<sup>rd</sup> ed. The World Bank; 2017[cited 2020 Nov 5]. Available from: <http://elibrary.worldbank.org/doi/book/10.1596/978-1-4648-0527-1>
2. Anderson PD, Suter RE, Mulligan T, et al. World health assembly resolution 60.22 and its importance as a health care policy tool for improving emergency care access and availability globally. *Ann Emerg Med*. 2012;60(1):35-44. DOI: 10.1016/j.annemergmed.2011.10.018. DOI: 10.1016/j.annemergmed.2011.10.018
3. Emergency care systems for universal health coverage: ensuring timely care for the acutely ill and injured. Seventy-Second World Health Assembly. May 28, 2019 [cited 2020 Nov 5]. Available from: <https://www.who.int/publications/i/item/emergency-care-systems-for-universal-health-coverage-ensuring-timely-care-for-the-acutely-ill-and-injured>
4. Razzak JA, Kellermann AL. Emergency medical care in developing countries: is it worthwhile?. *Bull World Health Organ*. 2002;80(11):900-905. Available from: <https://doi.org/https://www.ncbi.nlm.nih.gov/pmc/articles/PMC2567674/>
5. Anderson P. The globalization of emergency medicine and its importance for public health. *Bull World Health Organ*. 2006;84(10):835-838. DOI: 10.2471/blt.05.028548
6. Risko N, Chandra A, Burkholder TW, et al. Advancing research on the economic value of emergency care. *BMJ Glob Health*. 2019;4(6). DOI:10.1136/bmjgh-2019-001768
7. Thind A, Hsia R, Mabweijano J, et al. Essential Surgery: Disease Control Priorities. Vol 1. 3<sup>rd</sup> ed. The International Bank for Reconstruction and Development / The World Bank;



- 1  
2  
3 2015. [cited 2020 Nov 9]. Available from:  
4  
5 <http://www.ncbi.nlm.nih.gov/books/NBK333513/>  
6  
7  
8  
9 8. Gosselin R, Spiegel DA, Coughlin R, et al. Injuries: the neglected burden in developing  
10 countries. *Bull World Health Organ*. 2009;87(4):246-246. DOI: 10.2471/BLT.08.052290  
11  
12  
13  
14 9. Calvello EJB, Broccoli M, Risko N, et al. Emergency care and health systems: consensus-  
15 based recommendations and future research priorities. *Acad Emerg Med*.  
16  
17 2013;20(12):1278-1288. DOI: 10.1111/acem.12266  
18  
19  
20  
21  
22 10. Razzak J, Usmani MF, Bhutta ZA. Global, regional and national burden of emergency  
23 medical diseases using specific emergency disease indicators: analysis of the 2015 global  
24 burden of disease study. *BMJ Glob Health*. 2019;4(2). DOI:10.1136/bmjgh-2018-000733  
25  
26  
27  
28  
29  
30 11. *Basic Package for Health and Social Welfare Services for Liberia*. Ministry of Health and  
31 Social Welfare Republic of Liberia. June 2008;42. [cited 2020 Nov 5]. Available from:  
32 [http://liberiamohsw.org/Policies%20&%20Plans/Basic%20Package%20for%20Health%20](http://liberiamohsw.org/Policies%20&%20Plans/Basic%20Package%20for%20Health%20&%20Social%20Welfare%20for%20Liberia.pdf)  
33 [&%20Social%20Welfare%20for%20Liberia.pdf](http://liberiamohsw.org/Policies%20&%20Plans/Basic%20Package%20for%20Health%20&%20Social%20Welfare%20for%20Liberia.pdf)  
34  
35  
36  
37  
38  
39  
40 12. Kruk ME, Rockers PC, Williams EH, et al. Availability of essential health services in post-  
41 conflict Liberia. *Bull World Health Organ*. 2010;88(7):527-534. DOI:  
42 10.2471/BLT.09.071068  
43  
44  
45  
46  
47  
48 13. Hexom B, Calvello EJB, Babcock CA, et al. A model for emergency medicine education in  
49 post-conflict Liberia. *Afr J Emerg Med*. 2012;2(4):143-150.  
50  
51  
52  
53  
54  
55  
56  
57  
58  
59  
60

- 1  
2  
3  
4  
5  
6  
7  
8  
9  
10  
11  
12  
13  
14  
15  
16  
17  
18  
19  
20  
21  
22  
23  
24  
25  
26  
27  
28  
29  
30  
31  
32  
33  
34  
35  
36  
37  
38  
39  
40  
41  
42  
43  
44  
45  
46  
47  
48  
49  
50  
51  
52  
53  
54  
55  
56  
57  
58  
59  
60
14. McQuilkin PA, Udhayashankar K, Niescierenko M, et al. Health-care access during the Ebola virus epidemic in Liberia. *Am J Trop Med Hyg.* 2017;97(3):931-936. DOI: 10.4269/ajtmh.16-0702
  15. Downie R. The Road to Recovery: Rebuilding Liberia's Health System. Center for Strategic and International Studies: August 2012;24. [cited 2020 Nov 5]. Available from: [https://csis-website-prod.s3.amazonaws.com/s3fs-public/legacy\\_files/files/publication/120822\\_Downie\\_RoadtoRecovery\\_web.pdf](https://csis-website-prod.s3.amazonaws.com/s3fs-public/legacy_files/files/publication/120822_Downie_RoadtoRecovery_web.pdf)
  16. 2008 National Population and Housing Census: preliminary results. Government of the Republic of Liberia. June 2008;23. [cited 2020 Nov 5]. Available from: [https://www.emansion.gov.lr/doc/census\\_2008provisionalresults.pdf](https://www.emansion.gov.lr/doc/census_2008provisionalresults.pdf)
  17. Mitchell R, McKup JJ, Bue O, et al. Implementation of a novel three-tier triage tool in Papua New Guinea: a model for resource-limited emergency departments. *Lancet Reg Health - West Pac.* 2020;5:100051. DOI: 10.1016/j.lanwpc.2020.100051
  18. Mitchell R, Bue O, Nou G, et al. Validation of the interagency triage tool in a resource limited, urban emergency department in Papua New Guinea: a pilot study. *Lancet Reg Health-West Pac.* 2021;13:100194. DOI: <https://doi.org/10.1016/j.lanwpc.2021.100194>
  19. World Health Organization. Clinical care for severe acute respiratory infection: toolkit. COVID-19 adaptation [Internet]. Geneva: World Health Organization; 2020 [cited 2020 Dec 27]. 13-15p. Available from: <https://apps.who.int/iris/handle/10665/331736>

- 1  
2  
3  
4  
5  
6  
7  
8  
9  
10  
11  
12  
13  
14  
15  
16  
17  
18  
19  
20  
21  
22  
23  
24  
25  
26  
27  
28  
29  
30  
31  
32  
33  
34  
35  
36  
37  
38  
39  
40  
41  
42  
43  
44  
45  
46  
47  
48  
49  
50  
51  
52  
53  
54  
55  
56  
57  
58  
59  
60
20. Olufadeji A, Usoro A, Akubueze CE, et al. Results from the implementation of the World Health Organization basic emergency care course in Lagos, Nigeria. *Afr J Emerg Med.* 2021;11(2):231-236. DOI: 10.1016/j.afjem.2021.02.004
  21. Kivlehan SM, Dixon J, Kalanzi J, et al. Strengthening emergency care knowledge and skills in Uganda and Tanzania with the WHO-ICRC basic emergency care course. *Emerg Med J.* 2021;38(8):636-642. DOI: 10.1136/emered-2020-209718
  22. WHO Standardized Clinical Form. World Health Organization. January 14, 2020 [cited 2022 April 1] Available from: <https://www.who.int/publications/i/item/who-standardized-clinical-form>
  23. Broccoli MC, Moresky R, Dixon J, et al. Defining quality indicators for emergency care delivery: findings of an expert consensus process by emergency care practitioners in Africa. *BMJ Glob Health.* 2018;3(1):e000479. DOI: 10.1136/bmjgh-2017-000479
  24. Aaronson EL, Marsh RH, Guha M, et al. Emergency department quality and safety indicators in resource-limited settings: an environmental survey. *Int J Emerg Med.* 2015;8(1):39. DOI 10.1186/s12245-015-0088-x
  25. World Health Organization. Quality of care [Internet]. Geneva: World Health Organization;2022 [cited 2022 Dec 27]. Available from: [https://www.who.int/health-topics/quality-of-care#tab=tab\\_1](https://www.who.int/health-topics/quality-of-care#tab=tab_1)
  26. Cooper RJ, Schriger DL, Flaherty HL, et al. Effect of vital signs on triage decisions. *Ann Emerg Med.* 2002;39(3):223-232. DOI: 10.1067/mem.2002.121524

- 1  
2  
3  
4  
5  
6  
7  
8  
9  
10  
11  
12  
13  
14  
15  
16  
17  
18  
19  
20  
21  
22  
23  
24  
25  
26  
27  
28  
29  
30  
31  
32  
33  
34  
35  
36  
37  
38  
39  
40  
41  
42  
43  
44  
45  
46  
47  
48  
49  
50  
51  
52  
53  
54  
55  
56  
57  
58  
59  
60
27. DeVita MA, Hillman K, Bellomo R, et al. Textbook of Rapid Response Systems: Concept and Implementation. Springer International Publishing; 2017. [cited 2020 Nov 5]. Available from: <http://link.springer.com/10.1007/978-3-319-39391-9>
28. *StataCorp. 2017. Stata Statistical Software: Release 15. College Station, TX: StataCorp LLC.*
29. Brekke IJ, Puntervoll LH, Pedersen PB, et al. The value of vital sign trends in predicting and monitoring clinical deterioration: A systematic review. *PLoS ONE*. 2019;14(1). DOI: 10.1371/journal.pone.0210875
30. Vos T, Lim SS, Abbafati C, et al. Global burden of 369 diseases and injuries in 204 countries and territories, 1990–2019: a systematic analysis for the global burden of disease study 2019. *The Lancet*. 2020;396(10258):1204-1222. DOI: 10.1016/S0140-6736(20)30925-9
31. Stephen AH, Montoya RL, Aluisio AR. Sepsis and Septic Shock in Low- and Middle-Income Countries. *Surg Infect*. 2020;21(7):571-578. DOI: 10.1089/sur.2020.047

1  
2  
3  
4  
5  
6  
7  
8  
9  
10  
11  
12  
13  
14  
15  
16  
17  
18  
19  
20  
21  
22  
23  
24  
25  
26  
27  
28  
29  
30  
31  
32  
33  
34  
35  
36  
37  
38  
39  
40  
41  
42  
43  
44  
45  
46  
47  
48  
49  
50  
51  
52  
53  
54  
55  
56  
57  
58  
59  
60

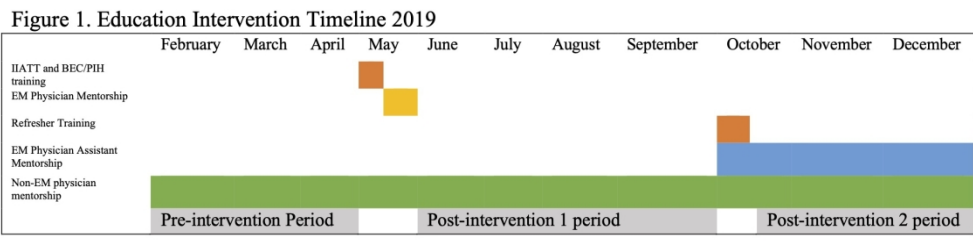

Figure 1 shows the timeline of the study including education session time periods, the time periods pre and post-interventions, as well as time periods where mentorship was provided.

795x192mm (72 x 72 DPI)

STROBE Statement—Checklist of items that should be included in reports of *cross-sectional studies*

|                              | Item No | Recommendation                                                                                                                                                                                    | Page No |
|------------------------------|---------|---------------------------------------------------------------------------------------------------------------------------------------------------------------------------------------------------|---------|
| <b>Title and abstract</b>    | 1       | (a) Indicate the study's design with a commonly used term in the title or the abstract                                                                                                            | 1       |
|                              |         | (b) Provide in the abstract an informative and balanced summary of what was done and what was found                                                                                               | 1-2     |
| <b>Introduction</b>          |         |                                                                                                                                                                                                   |         |
| Background/rationale         | 2       | Explain the scientific background and rationale for the investigation being reported                                                                                                              | 3-4     |
| Objectives                   | 3       | State specific objectives, including any prespecified hypotheses                                                                                                                                  | 4       |
| <b>Methods</b>               |         |                                                                                                                                                                                                   |         |
| Study design                 | 4       | Present key elements of study design early in the paper                                                                                                                                           | 4       |
| Setting                      | 5       | Describe the setting, locations, and relevant dates, including periods of recruitment, exposure, follow-up, and data collection                                                                   | 4-6     |
| Participants                 | 6       | (a) Give the eligibility criteria, and the sources and methods of selection of participants                                                                                                       | 6-7     |
| Variables                    | 7       | Clearly define all outcomes, exposures, predictors, potential confounders, and effect modifiers. Give diagnostic criteria, if applicable                                                          | 7-8     |
| Data sources/<br>measurement | 8*      | For each variable of interest, give sources of data and details of methods of assessment (measurement). Describe comparability of assessment methods if there is more than one group              | 7-8     |
| Bias                         | 9       | Describe any efforts to address potential sources of bias                                                                                                                                         | 16      |
| Study size                   | 10      | Explain how the study size was arrived at                                                                                                                                                         | 6,9     |
| Quantitative variables       | 11      | Explain how quantitative variables were handled in the analyses. If applicable, describe which groupings were chosen and why                                                                      | 7-8     |
| Statistical methods          | 12      | (a) Describe all statistical methods, including those used to control for confounding                                                                                                             | 9       |
|                              |         | (b) Describe any methods used to examine subgroups and interactions                                                                                                                               | 9       |
|                              |         | (c) Explain how missing data were addressed                                                                                                                                                       | 7       |
|                              |         | (d) If applicable, describe analytical methods taking account of sampling strategy                                                                                                                | N/A     |
|                              |         | (e) Describe any sensitivity analyses                                                                                                                                                             | N/A     |
| <b>Results</b>               |         |                                                                                                                                                                                                   |         |
| Participants                 | 13*     | (a) Report numbers of individuals at each stage of study—eg numbers potentially eligible, examined for eligibility, confirmed eligible, included in the study, completing follow-up, and analysed | 9-11    |
|                              |         | (b) Give reasons for non-participation at each stage                                                                                                                                              | 9       |
|                              |         | (c) Consider use of a flow diagram                                                                                                                                                                |         |
| Descriptive data             | 14*     | (a) Give characteristics of study participants (eg demographic, clinical, social) and information on exposures and potential confounders                                                          | 9-10    |
|                              |         | (b) Indicate number of participants with missing data for each variable of interest                                                                                                               | 9       |
| Outcome data                 | 15*     | Report numbers of outcome events or summary measures                                                                                                                                              | 10-11   |

|    |                          |    |                                                                                                                                                                                                              |       |
|----|--------------------------|----|--------------------------------------------------------------------------------------------------------------------------------------------------------------------------------------------------------------|-------|
| 1  |                          |    |                                                                                                                                                                                                              |       |
| 2  | Main results             | 16 | (a) Give unadjusted estimates and, if applicable, confounder-adjusted estimates and their precision (eg, 95% confidence interval). Make clear which confounders were adjusted for and why they were included | 10-11 |
| 3  |                          |    |                                                                                                                                                                                                              |       |
| 4  |                          |    |                                                                                                                                                                                                              |       |
| 5  |                          |    | (b) Report category boundaries when continuous variables were categorized                                                                                                                                    | 10-11 |
| 6  |                          |    | (c) If relevant, consider translating estimates of relative risk into absolute risk for a meaningful time period                                                                                             | N/A   |
| 7  |                          |    |                                                                                                                                                                                                              |       |
| 8  |                          |    |                                                                                                                                                                                                              |       |
| 9  |                          |    |                                                                                                                                                                                                              |       |
| 10 |                          |    |                                                                                                                                                                                                              |       |
| 11 | Other analyses           | 17 | Report other analyses done—eg analyses of subgroups and interactions, and sensitivity analyses                                                                                                               | 10    |
| 12 |                          |    |                                                                                                                                                                                                              |       |
| 13 |                          |    |                                                                                                                                                                                                              |       |
| 14 | <b>Discussion</b>        |    |                                                                                                                                                                                                              |       |
| 15 | Key results              | 18 | Summarise key results with reference to study objectives                                                                                                                                                     | 13-16 |
| 16 |                          |    |                                                                                                                                                                                                              |       |
| 17 |                          |    |                                                                                                                                                                                                              |       |
| 18 | Limitations              | 19 | Discuss limitations of the study, taking into account sources of potential bias or imprecision. Discuss both direction and magnitude of any potential bias                                                   | 16-17 |
| 19 |                          |    |                                                                                                                                                                                                              |       |
| 20 |                          |    |                                                                                                                                                                                                              |       |
| 21 | Interpretation           | 20 | Give a cautious overall interpretation of results considering objectives, limitations, multiplicity of analyses, results from similar studies, and other relevant evidence                                   | 16-17 |
| 22 |                          |    |                                                                                                                                                                                                              |       |
| 23 |                          |    |                                                                                                                                                                                                              |       |
| 24 |                          |    |                                                                                                                                                                                                              |       |
| 25 | Generalisability         | 21 | Discuss the generalisability (external validity) of the study results                                                                                                                                        | 17    |
| 26 |                          |    |                                                                                                                                                                                                              |       |
| 27 | <b>Other information</b> |    |                                                                                                                                                                                                              |       |
| 28 | Funding                  | 22 | Give the source of funding and the role of the funders for the present study and, if applicable, for the original study on which the present article is based                                                | 24    |
| 29 |                          |    |                                                                                                                                                                                                              |       |
| 30 |                          |    |                                                                                                                                                                                                              |       |
| 31 |                          |    |                                                                                                                                                                                                              |       |
| 32 |                          |    |                                                                                                                                                                                                              |       |

\*Give information separately for exposed and unexposed groups.

**Note:** An Explanation and Elaboration article discusses each checklist item and gives methodological background and published examples of transparent reporting. The STROBE checklist is best used in conjunction with this article (freely available on the Web sites of PLoS Medicine at <http://www.plosmedicine.org/>, Annals of Internal Medicine at <http://www.annals.org/>, and Epidemiology at <http://www.epidem.com/>). Information on the STROBE Initiative is available at [www.strobe-statement.org](http://www.strobe-statement.org).
